# Supplementary material for: Implementing an infection control and prevention program decreases the incidence of healthcare-associated infections and antibiotic resistance in a Russian neuro-ICU
Source: Springer Nature journal article supplement (doi:10.1186/s13756-018-0383-4), 2018-07-31
Supplement: MOESM1 [file 15991972]

**Table 1 Supplementary.** The description of parameters, collected in the daily epidemiological surveillance in the neuro-ICU department at Neurosurgical Institute, Moscow, Russia.

| Group                                      | # | The list of parameters                                               | Values/comments                                                                                        |
|--------------------------------------------|---|----------------------------------------------------------------------|--------------------------------------------------------------------------------------------------------|
| <b>General features</b>                    | 1 | Age                                                                  | Age in years                                                                                           |
|                                            | 2 | Gender                                                               | Male or Female                                                                                         |
|                                            | 3 | Clinical diagnosis                                                   | Tumor; Trauma; Vascular diseases; Congenital disorders; Spinal diseases; Other                         |
|                                            | 4 | Charlson Comorbidity Index (CCI)                                     | 0-37 points                                                                                            |
|                                            | 5 | Patient's ID                                                         | Unique ID number, format XXXX/XX                                                                       |
| <b>Technical parameters</b>                | 1 | Day in the ICU                                                       | Length of stay in the ICU                                                                              |
|                                            | 2 | Date                                                                 | Actual date, format dd/mm/yyyy                                                                         |
| <b>Indwelling medical invasive devices</b> | 1 | External ventricular drain (EVD)                                     | Yes - 1; No - 0                                                                                        |
|                                            | 2 | Intracranial pressure monitoring (ICPM)                              | Yes - 1; No - 0                                                                                        |
|                                            | 3 | Endotracheal intubation tube                                         | Encoding:<br>0: No tube<br>1: Oral intubation tube<br>2: Nasal intubation tube<br>3: Tracheostomy tube |
|                                            | 4 | Central line                                                         | Yes - 1; No - 0                                                                                        |
|                                            | 5 | Arterial line                                                        | Yes - 1; No - 0                                                                                        |
|                                            | 6 | Urinary catheter                                                     | Yes - 1; No - 0                                                                                        |
|                                            | 7 | Feeding tube                                                         | Yes - 1; No - 0                                                                                        |
|                                            | 8 | Pleural drainage                                                     | Yes - 1; No - 0                                                                                        |
| <b>The signs of disease severity</b>       | 1 | Mechanical ventilation                                               | Yes - 1; No - 0                                                                                        |
|                                            | 2 | FiO <sub>2</sub>                                                     | O <sub>2</sub> concentration; if on room air FiO <sub>2</sub> =0.21                                    |
|                                            | 3 | Induced hypothermia                                                  | Yes - 1; No - 0                                                                                        |
|                                            | 4 | Hemodialysis                                                         | Yes - 1; No - 0                                                                                        |
|                                            | 5 | Total parenteral feeding                                             | Yes - 1; No - 0                                                                                        |
| <b>The signs of infections</b>             | 1 | Number of tracheal sanations per day                                 | Number of tracheal sanations per day                                                                   |
|                                            | 2 | Purulent sputum                                                      | Yes - 1; No - 0                                                                                        |
|                                            | 3 | Infiltration on the chest X-ray                                      | Yes - 1; No - 0                                                                                        |
|                                            | 4 | Intestinal dysfunction                                               | Yes - 1; No - 0                                                                                        |
|                                            | 5 | Body temperature                                                     | Temperature in Celsius degrees                                                                         |
| <b>Surgical procedures</b>                 | 1 | Surgical procedure, type Craniotomy                                  | Number of procedures                                                                                   |
|                                            | 2 | Length of the surgical procedure, type Craniotomy                    | Length in minutes                                                                                      |
|                                            | 3 | Surgical procedure, type Implantation of Neurosurgical Device (INSD) | Number of procedures                                                                                   |
|                                            | 4 | Length of the surgical procedure, type INSD                          | Length in minutes                                                                                      |

Table 1 Supplementary. Continue

| Group                                          | #         | The list of parameters                                                       | Values                                                                                                                                                                                                                    |
|------------------------------------------------|-----------|------------------------------------------------------------------------------|---------------------------------------------------------------------------------------------------------------------------------------------------------------------------------------------------------------------------|
| <b>Surgical procedures</b>                     | 5         | Surgical procedure, type Spinal Surgery                                      | Number of procedures                                                                                                                                                                                                      |
|                                                | 6         | Length of the surgical procedure, type Spinal Surgery                        | Length in minutes                                                                                                                                                                                                         |
|                                                | 7         | Surgical procedure, type Endoscopic Endonasal Transsphenoidal Surgery (EETS) | Number of procedures                                                                                                                                                                                                      |
|                                                | 8         | Length of the surgical procedure, type EETS                                  | Length in minutes                                                                                                                                                                                                         |
|                                                | 9         | Surgical procedure, type Other Non-Cranial Surgeries                         | Number of procedures                                                                                                                                                                                                      |
|                                                | 10        | Length of the surgical procedure, type Other Non-Cranial Surgeries           | Length in minutes                                                                                                                                                                                                         |
| <b>Neurological &amp; neurosurgical status</b> | 1         | Disorders of consciousness with a match to Glasgow Coma Scale (GCS)          | Encoding:<br>7: full consciousness (GCS = 15),<br>6: drowsiness (GCS = 12-14),<br>5: stupor (GCS = 9-12),<br>4: coma-1 (GCS = 7-8),<br>3: coma-2 (GCS = 5-6),<br>2: coma-3 (GCS = 3-4),<br>1: persistent vegetative state |
|                                                | 2         | RASS scale score                                                             | Points from -3 to 3                                                                                                                                                                                                       |
|                                                | 3         | Convulsions                                                                  | Yes - 1; No - 0                                                                                                                                                                                                           |
|                                                | 4         | PBSS score                                                                   | 6-12 points                                                                                                                                                                                                               |
|                                                | 5         | CSF leakage from surgical site (CSFL-SS)                                     | Yes - 1; No - 0                                                                                                                                                                                                           |
|                                                | 6         | CSF leakage from nose and/or ears (CSFL-NE)                                  | Yes - 1; No - 0                                                                                                                                                                                                           |
| <b>Medications</b>                             | 1         | Antibiotics                                                                  | Number of antibiotics per day                                                                                                                                                                                             |
|                                                | 2         | Anxiolytics                                                                  | Yes - 1; No - 0                                                                                                                                                                                                           |
|                                                | 3         | Vasopressors                                                                 | Yes - 1; No - 0                                                                                                                                                                                                           |
|                                                | 4         | Sedative                                                                     | Yes - 1; No - 0                                                                                                                                                                                                           |
| <b>Healthcare-associated infections (HAIs)</b> | 1         | Respiratory infections                                                       | Yes - 1; No - 0                                                                                                                                                                                                           |
|                                                | 2         | Bloodstream infections                                                       | Yes - 1; No - 0                                                                                                                                                                                                           |
|                                                | 3         | Intracranial CNS infections                                                  | Yes - 1; No - 0                                                                                                                                                                                                           |
|                                                | 4         | Superficial surgical site infection (SSSI)                                   | Yes - 1; No - 0                                                                                                                                                                                                           |
|                                                | 5         | Urinary tract infections                                                     | Yes - 1; No - 0                                                                                                                                                                                                           |
|                                                | 6         | Other infections                                                             | Yes - 1; No - 0                                                                                                                                                                                                           |
| <b>Overall</b>                                 | <b>54</b> |                                                                              |                                                                                                                                                                                                                           |

## Supplementary Materials

**Table 2 Supplementary.** Summary of observations by years grouped by type of HAI. Mean growth rate per year is calculated as average of annual growth coefficient; p-value obtained from linear regression. Abbreviations: VAP - Ventilator-Associated Pneumonia; CLABSI - Central Line-associated Bloodstream Infection; CAUTI - Catheter-Associated Urinary Tract Infection; HAVM - Healthcare-Associated Ventilator & Meningitis, Q1;Q3 - first and third quartiles.

| Infection                            | Parameter                                 | 2011 | 2012 | 2013 | 2014 | 2015 | 2016 | Median [Q1;Q3]    | Mean growth rate per year (%) | p-value |
|--------------------------------------|-------------------------------------------|------|------|------|------|------|------|-------------------|-------------------------------|---------|
|                                      | Patients, total                           | 313  | 350  | 361  | 341  | 326  | 347  | 344 [330; 349]    | 2.3                           | 0.6476  |
|                                      | Patient-days, total                       | 6778 | 7460 | 7217 | 7483 | 6644 | 5809 | 6998 [6678; 7399] | -2.7                          | 0.2174  |
| <i>All HA respiratory infections</i> | Patients with infection                   | 113  | 156  | 120  | 105  | 79   | 85   | 109 [90; 118]     | -2.9                          | 0.0893  |
|                                      | Days with infection                       | 1643 | 2215 | 1407 | 1499 | 1063 | 690  | 1453 [1149; 1607] | -11.9                         | 0.0378  |
|                                      | Incidence per 1000 patient-days           | 16.7 | 20.9 | 16.6 | 14.0 | 11.9 | 14.6 | 15.6 [14.2; 16.7] | -0.6                          | 0.1274  |
| <i>All HA urinary infections</i>     | Patients with infection                   | 91   | 151  | 125  | 102  | 96   | 74   | 99 [92; 119]      | 0.3                           | 0.2763  |
|                                      | Days with infection                       | 1263 | 2424 | 1901 | 2083 | 1505 | 1239 | 1703 [1324; 2038] | 6.9                           | 0.5621  |
|                                      | Incidence per 1000 patient-days           | 13.4 | 20.2 | 17.3 | 13.6 | 14.5 | 12.7 | 14.0 [13.5; 16.6] | 1.8                           | 0.3684  |
| <i>All types of HAVM</i>             | Patients with infection                   | 50   | 41   | 35   | 30   | 20   | 27   | 33 [28; 40]       | -9.1                          | 0.0096  |
|                                      | Days with infection                       | 613  | 516  | 536  | 799  | 322  | 437  | 526 [457; 594]    | 2.6                           | 0.4373  |
|                                      | Incidence per 1000 patient-days           | 7.4  | 5.5  | 4.9  | 4.0  | 3.0  | 4.7  | 4.8 [4.2; 5.3]    | -5.0                          | 0.0595  |
| <i>All HA bloodstream infections</i> | Patients with infection                   | 22   | 26   | 12   | 25   | 19   | 15   | 21 [16; 24]       | 5.5                           | 0.4157  |
|                                      | Days with infection                       | 208  | 166  | 91   | 178  | 114  | 107  | 140 [109; 175]    | -2.4                          | 0.1540  |
|                                      | Incidence per 1000 patient-days           | 3    | 3    | 2    | 3    | 3    | 3    | 3 [3; 3]          | 6.4                           | 0.5900  |
| <i>VAP</i>                           | Patients with device                      | 236  | 275  | 264  | 248  | 232  | 246  | 247 [239; 260]    | 1.2                           | 0.5529  |
|                                      | Device-days                               | 4413 | 4912 | 5160 | 4733 | 4623 | 3738 | 4678 [4466; 4867] | -2.7                          | 0.3036  |
|                                      | Patients with device-associated infection | 67   | 89   | 63   | 57   | 50   | 58   | 61 [57; 66]       | -0.4                          | 0.1508  |
|                                      | Days with device-associated infection     | 865  | 1318 | 796  | 777  | 649  | 473  | 787 [681; 848]    | -6.6                          | 0.0849  |
|                                      | Incidence per 1000 device-days            | 15.2 | 18.1 | 12.2 | 12.0 | 10.8 | 15.5 | 13.7 [12.1; 15.4] | 3.7                           | 0.4373  |
|                                      | Device utilization ratio                  | 0.65 | 0.66 | 0.71 | 0.63 | 0.70 | 0.64 | 0.65 [0.65; 0.69] | 0.1                           | 0.9793  |
| <i>CAUTI</i>                         | Patients with device                      | 271  | 314  | 308  | 279  | 269  | 284  | 282 [273; 302]    | 1.3                           | 0.5948  |
|                                      | Device-days                               | 4585 | 4989 | 5169 | 4729 | 5000 | 4182 | 4859 [4621; 4997] | -1.3                          | 0.4815  |
|                                      | Patients with device-associated infection | 76   | 111  | 85   | 74   | 72   | 52   | 75 [73; 83]       | -4.2                          | 0.1327  |
|                                      | Days with device-associated infection     | 1155 | 1830 | 1230 | 1815 | 1317 | 834  | 1274 [1174; 1691] | 1.8                           | 0.4969  |
|                                      | Incidence per 1000 device-days            | 16.6 | 22.3 | 16.4 | 15.7 | 14.4 | 12.4 | 16.0 [14.7; 16.5] | -3.7                          | 0.0995  |
|                                      | Device utilization ratio                  | 0.68 | 0.67 | 0.72 | 0.63 | 0.75 | 0.72 | 0.70 [0.67; 0.72] | 1.8                           | 0.3420  |
| <i>EVD-associated HAVM</i>           | Patients with device                      | 107  | 114  | 108  | 105  | 90   | 92   | 106 [95; 108]     | -2.7                          | 0.0363  |
|                                      | Device-days                               | 1037 | 865  | 870  | 928  | 850  | 665  | 868 [854; 914]    | -7.9                          | 0.0491  |
|                                      | Patients with device-associated infection | 23   | 17   | 14   | 12   | 7    | 9    | 13 [10; 16]       | -14.2                         | 0.0049  |
|                                      | Days with device-associated infection     | 200  | 147  | 133  | 170  | 109  | 109  | 140 [115; 164]    | -8.8                          | 0.0585  |
|                                      | Incidence per 1000 device-days            | 22.2 | 19.7 | 16.1 | 12.9 | 8.2  | 13.5 | 14.8 [13.1; 18.8] | -4.2                          | 0.0277  |
|                                      | Device utilization ratio                  | 0.15 | 0.12 | 0.12 | 0.12 | 0.13 | 0.11 | 0.12 [0.12; 0.13] | -4.9                          | 0.2286  |
| <i>CLABSI</i>                        | Patients with device                      | 305  | 345  | 349  | 327  | 309  | 318  | 323 [311; 341]    | 1.1                           | 0.7194  |
|                                      | Device-days                               | 5266 | 5403 | 5911 | 4903 | 4477 | 3283 | 5085 [4584; 5369] | -8.1                          | 0.0564  |
|                                      | Patients with device-associated infection | 18   | 20   | 10   | 24   | 19   | 12   | 19 [14; 20]       | 8.7                           | 0.7125  |
|                                      | Days with device-associated infection     | 181  | 123  | 73   | 174  | 114  | 85   | 119 [92; 161]     | 1.1                           | 0.3283  |
|                                      | Incidence per 1000 device-days            | 3.4  | 3.7  | 1.7  | 4.9  | 4.2  | 3.7  | 3.7 [3.5; 4.1]    | 23.2                          | 0.5640  |
|                                      | Device utilization ratio                  | 0.78 | 0.72 | 0.82 | 0.66 | 0.67 | 0.57 | 0.70 [0.66; 0.76] | -5.4                          | 0.0528  |

Supplementary Materials

**Table 3 Supplementary.** Proportion of patients and days in groups device-associated HAIs (DA-HAI) vs. all HAIs different types of HAIs. P-values obtained from Chi-square test.

| <i>Infection</i>              | Parameter                                     | Total<br>% [95% CI] | 2011<br>% | 2012<br>% | 2013<br>% | 2014<br>% | 2015<br>% | 2016<br>% | Mean<br>growth rate<br>per year (%) | p-value |
|-------------------------------|-----------------------------------------------|---------------------|-----------|-----------|-----------|-----------|-----------|-----------|-------------------------------------|---------|
| <i>Respiratory infections</i> | Proportion of patients in groups DA-HAI / HAI | 58.4% [54.6-62.1]   | 59.3      | 57.1      | 52.5      | 54.3      | 63.3      | 68.2      | 3.2                                 | 0.88355 |
|                               | Proportion of days in groups DA-HAI / HAI     | 57.3% [56.2-58.3]   | 52.6      | 59.5      | 56.6      | 51.8      | 61.1      | 68.6      | 6.0                                 | 0.00076 |
| <i>Urinary infections</i>     | Proportion of patients in groups DA-HAI / HAI | 73.6% [70.1-77.0]   | 83.5      | 73.5      | 68.0      | 72.5      | 75.0      | 70.3      | -3.1                                | 0.95685 |
|                               | Proportion of days in groups DA-HAI / HAI     | 78.6% [77.8-79.3]   | 91.4      | 75.5      | 64.7      | 87.1      | 87.5      | 67.3      | -3.9                                | 0.00000 |
| <i>HAVM</i>                   | Proportion of patients in groups DA-HAI / HAI | 40.4% [33.6-47.1]   | 46.0      | 41.5      | 40.0      | 40.0      | 35.0      | 33.3      | -6.1                                | 0.98644 |
|                               | Proportion of days in groups DA-HAI / HAI     | 26.9% [25.4-28.5]   | 32.6      | 28.5      | 24.8      | 21.3      | 33.9      | 24.9      | -1.4                                | 0.00172 |
| <i>Bloodstream infections</i> | Proportion of patients in groups DA-HAI / HAI | 86.6% [80.4-92.7]   | 81.8      | 76.9      | 83.3      | 96.0      | 100.0     | 80.0      | 0.3                                 | 0.98942 |
|                               | Proportion of days in groups DA-HAI / HAI     | 86.8% [84.5-89.1]   | 87.0      | 74.1      | 80.2      | 97.8      | 100.0     | 79.4      | -0.6                                | 0.44259 |

**Table 4 Supplementary.** Cumulative incidence of different types of HAIs. P-values obtained from Chi-square test. Abbreviations: VAP - Ventilator-Associated Pneumonia; CLABSI - Central Line-associated Bloodstream Infection; CAUTI - Catheter-Associated Urinary Tract Infection; HAVM - Healthcare-Associated Ventiliculis & Meningitis.

| <i>Infection</i>                                                  | 2011                            | 2012                  | 2013                  | 2014                  | 2015                  | 2016                  | p-value               |        |
|-------------------------------------------------------------------|---------------------------------|-----------------------|-----------------------|-----------------------|-----------------------|-----------------------|-----------------------|--------|
| <i>Cumulative incidence (% and 95 CI), all HAIs</i>               | <b>Respiratory infections</b>   | 36.1%<br>[30.8-41.4]  | 44.57%<br>[39.4-49.8] | 33.24%<br>[28.4-38.1] | 30.79%<br>[25.9-35.7] | 24.23%<br>[19.6-28.9] | 24.5%<br>[20.0-29.0]  | 0.0003 |
|                                                                   | <b>Urinary-tract infections</b> | 29.07%<br>[24.0-34.1] | 43.14%<br>[38.0-48.3] | 34.63%<br>[29.7-39.5] | 29.91%<br>[25.1-34.8] | 29.45%<br>[24.5-34.4] | 21.33%<br>[17.0-25.6] | 0.0006 |
|                                                                   | <b>HAVM</b>                     | 15.97%<br>[11.9-20.0] | 11.71%<br>[8.3-15.1]  | 9.7%<br>[6.6-12.7]    | 8.8%<br>[5.8-11.8]    | 6.13%<br>[3.5-8.7]    | 7.78%<br>[5.0-10.6]   | 0.0040 |
|                                                                   | <b>Bloodstream infections</b>   | 7.03%<br>[4.2-9.9]    | 7.43%<br>[4.7-10.2]   | 3.32%<br>[1.5-5.2]    | 7.33%<br>[4.6-10.1]   | 5.83%<br>[3.3-8.4]    | 4.32%<br>[2.2-6.5]    | 0.1343 |
| <i>Cumulative incidence (% and 95 CI), device-associated HAIs</i> | <b>VAP</b>                      | 28.39%<br>[22.6-34.1] | 32.36%<br>[26.8-37.9] | 23.86%<br>[18.7-29.0] | 22.98%<br>[17.7-28.2] | 21.55%<br>[16.3-26.8] | 23.58%<br>[18.3-28.9] | 0.2518 |
|                                                                   | <b>CAUTI</b>                    | 28.04%<br>[22.7-33.4] | 35.35%<br>[30.1-40.6] | 27.6%<br>[22.6-32.6]  | 26.52%<br>[21.3-31.7] | 26.77%<br>[21.5-32.1] | 18.31%<br>[13.8-22.8] | 0.0259 |
|                                                                   | <b>EVD-associated HAVM</b>      | 21.5%<br>[13.7-29.3]  | 14.91%<br>[8.4-21.5]  | 12.96%<br>[6.6-19.3]  | 11.43%<br>[5.3-17.5]  | 7.78%<br>[2.2-13.3]   | 9.78%<br>[3.7-15.9]   | 0.1805 |
|                                                                   | <b>CLABSI</b>                   | 5.9%<br>[3.3-8.5]     | 5.8%<br>[3.3-8.3]     | 2.87%<br>[1.1-4.6]    | 7.34%<br>[4.5-10.2]   | 6.15%<br>[3.5-8.8]    | 3.77%<br>[1.7-5.9]    | 0.1399 |

Supplementary Materials

**Table 5 Supplementary.** Multifactorial Cox regression analysis of survival. Adjusted hazard ratio (HR) with 95% confidence intervals (95% CI) and p-values are presented. Red color highlights the factor increasing the likelihood of death; blue color - factors which decrease the likelihood of death. Abbreviations: SSSI - superficial surgical site infection; INSD - implantation of neurosurgical devices; EETS - endoscopic endonasal transsphenoidal surgery.

|                  | <b>Factor</b>                 | <b>Adjusted HR [95% CI]</b> | <b>p-value</b> |
|------------------|-------------------------------|-----------------------------|----------------|
|                  | <b>Age</b>                    | 1.01 [1-1.01]               | 0.0353         |
| <i>General</i>   | <b>Male gender</b>            | 0.84 [0.67-1.06]            | 0.1443         |
|                  | <b>CCI</b>                    | 1.04 [0.99-1.1]             | 0.0967         |
|                  | <b>HAVM</b>                   | 1.43 [1.03-1.98]            | 0.0338         |
| <i>HAI</i> s     | <b>Bloodstream HAI</b>        | 1.32 [0.91-1.92]            | 0.1493         |
|                  | <b>Respiratory HAI</b>        | 1.04 [0.8-1.35]             | 0.7690         |
|                  | <b>Urinary HAI</b>            | 0.56 [0.43-0.74]            | 0.0004         |
|                  | <b>SSSI</b>                   | 1.26 [0.8-2]                | 0.3192         |
|                  | <b>Other HAI</b> s            | 0.94 [0.68-1.31]            | 0.7291         |
|                  | <b>Intestinal dysfunction</b> | 1.46 [1.11-1.93]            | 0.0069         |
| <i>Diagnosis</i> | <b>Congenital disorder</b>    | 1.61 [0.49-5.31]            | 0.4343         |
|                  | <b>Other diseases</b>         | 0.47 [0.06-3.41]            | 0.4524         |
|                  | <b>Brain trauma</b>           | 0.84 [0.48-1.47]            | 0.5318         |
|                  | <b>Brain tumor</b>            | 1.57 [1.1-2.24]             | 0.0122         |
| <i>Surgery</i>   | <b>Craniotomy</b>             | 0.64 [0.48-0.87]            | 0.0037         |
|                  | <b>EETS</b>                   | 1.02 [0.64-1.64]            | 0.9276         |
|                  | <b>Endovascular surgery</b>   | 1.11 [0.75-1.66]            | 0.5989         |
|                  | <b>INSD</b>                   | 1.59 [1.24-2.03]            | 0.0002         |
|                  | <b>Other surgeries</b>        | 0.93 [0.72-1.21]            | 0.5902         |

Supplementary Materials

**Table 6 Supplementary.** Summary of annual observations, intestinal dysfunction and feeding tube-associated intestinal dysfunction. Mean growth rate per year is calculated as average of annual growth coefficient; p-value obtained from linear regression, or from Chi-squared test (for cumulative incidence).

| Infection                                             | Parameter                                                                                            | 2011             | 2012             | 2013             | 2014             | 2015             | 2016             | Median [Q1;Q3]    | Mean growth rate per year (%) | p-value   |
|-------------------------------------------------------|------------------------------------------------------------------------------------------------------|------------------|------------------|------------------|------------------|------------------|------------------|-------------------|-------------------------------|-----------|
|                                                       | <b>Patients, total</b>                                                                               | 313              | 350              | 361              | 341              | 326              | 347              | 344 [330; 349]    | 2.3                           | 0.6476    |
|                                                       | <b>Patient-days, total</b>                                                                           | 6778             | 7460             | 7217             | 7483             | 6644             | 5809             | 6998 [6678; 7399] | -2.7                          | 0.2174    |
| <i>All-cause intestinal dysfunction</i>               | <b>Patients with intestinal_dysfunction</b>                                                          | 172              | 178              | 145              | 125              | 105              | 83               | 135 [110; 165]    | -13.2                         | 0.0009    |
|                                                       | <b>Days with intestinal dysfunction</b>                                                              | 1499             | 1644             | 1274             | 990              | 970              | 738              | 1132 [975; 1443]  | -12.2                         | 0.0050    |
|                                                       | <b>Cumulative incidence, % [95% CI]</b>                                                              | 54.9 [49.4-60.5] | 50.9 [45.6-56.1] | 40.2 [35.1-45.2] | 36.7 [31.5-41.8] | 32.2 [27.1-37.3] | 23.9 [19.4-28.4] | NA                | NA                            | 0.0000001 |
|                                                       | <b>Incidence per 1000 patient-days</b>                                                               | 25.4             | 23.9             | 20.1             | 16.7             | 15.8             | 14.3             | 18 [16; 23]       | -10.7                         | 0.0006    |
| <i>Feeding tube-associated intestinal dysfunction</i> | <b>Patients with feeding tube</b>                                                                    | 273              | 305              | 308              | 292              | 273              | 290              | 291 [277; 302]    | 1.4                           | 0.8565    |
|                                                       | <b>Patients with device-associated intestinal dysfunction</b>                                        | 96               | 103              | 99               | 84               | 70               | 61               | 90 [74; 98]       | -8.3                          | 0.0118    |
|                                                       | <b>Days with device-associated intestinal dysfunction</b>                                            | 855              | 983              | 956              | 555              | 630              | 625              | 743 [626; 931]    | -3.4                          | 0.0873    |
|                                                       | <b>Device-days, feeding tube</b>                                                                     | 5269             | 5838             | 5992             | 5562             | 5430             | 4387             | 5496 [5309; 5769] | -3.1                          | 0.2367    |
|                                                       | <b>Cumulative incidence, % [95% CI]</b>                                                              | 35.2 [29.5-40.8] | 33.8 [28.5-39.1] | 32.1 [26.9-37.4] | 28.8 [23.6-33.9] | 25.6 [20.5-30.8] | 21.0 [16.3-25.7] | NA                | NA                            | 0.0490    |
|                                                       | <b>Incidence per 1000 device-days</b>                                                                | 18.2             | 17.6             | 16.5             | 15.1             | 12.9             | 13.9             | 16 [14; 17]       | -5.0                          | 0.0047    |
|                                                       | <b>Proportion of patients in groups feeding tube-associated dysfunction / all-causes dysfunction</b> | 55.8             | 57.9             | 68.3             | 67.2             | 66.7             | 73.5             | 67 [60; 68]       | 5.9                           | 0.0132    |
|                                                       | <b>Proportion of days in groups feeding tube-associated dysfunction / all-causes dysfunction</b>     | 57.0             | 59.8             | 75.0             | 56.1             | 64.9             | 84.7             | 62 [58; 73]       | 10.3                          | 0.1782    |

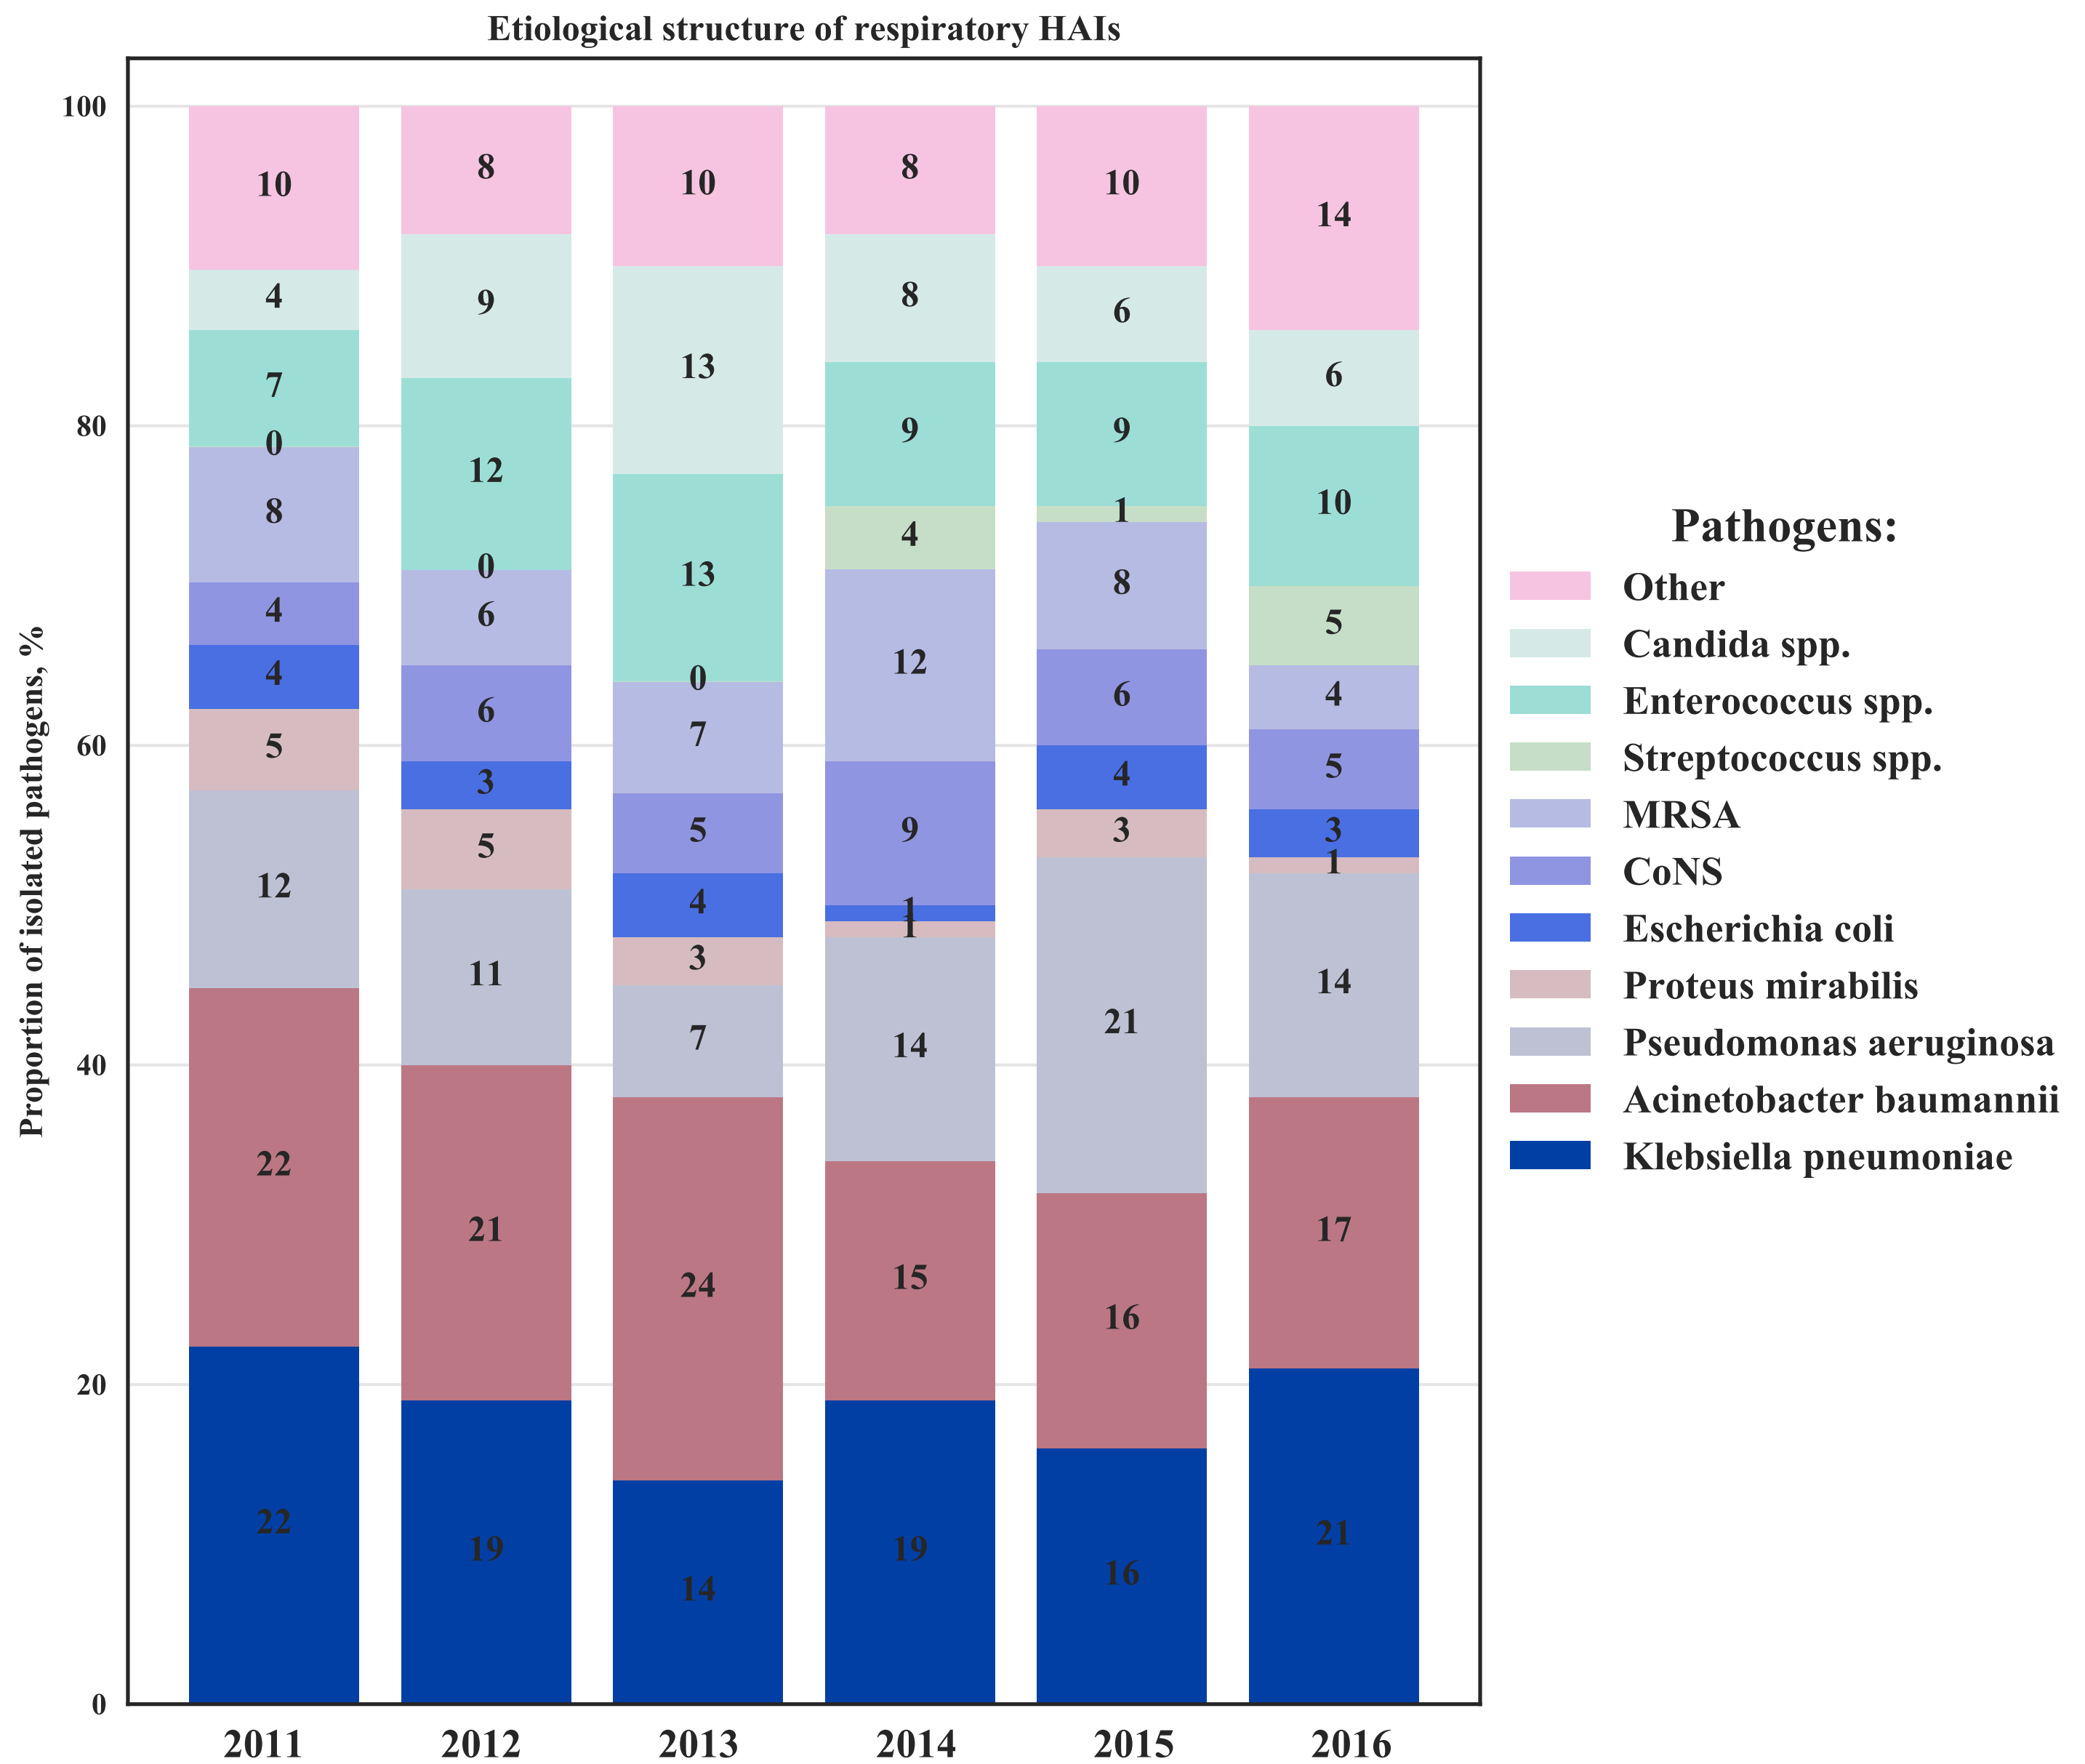

**Figure 1 Supplementary.** The dynamics of etiological structure of respiratory HAIs at the high-risk patient population in neuro-ICU from 2011 to 2016. Abbreviations: MRSA - methicillin-resistant *Staphylococcus aureus*; CoNS - coagulase-negative Staphylococci.

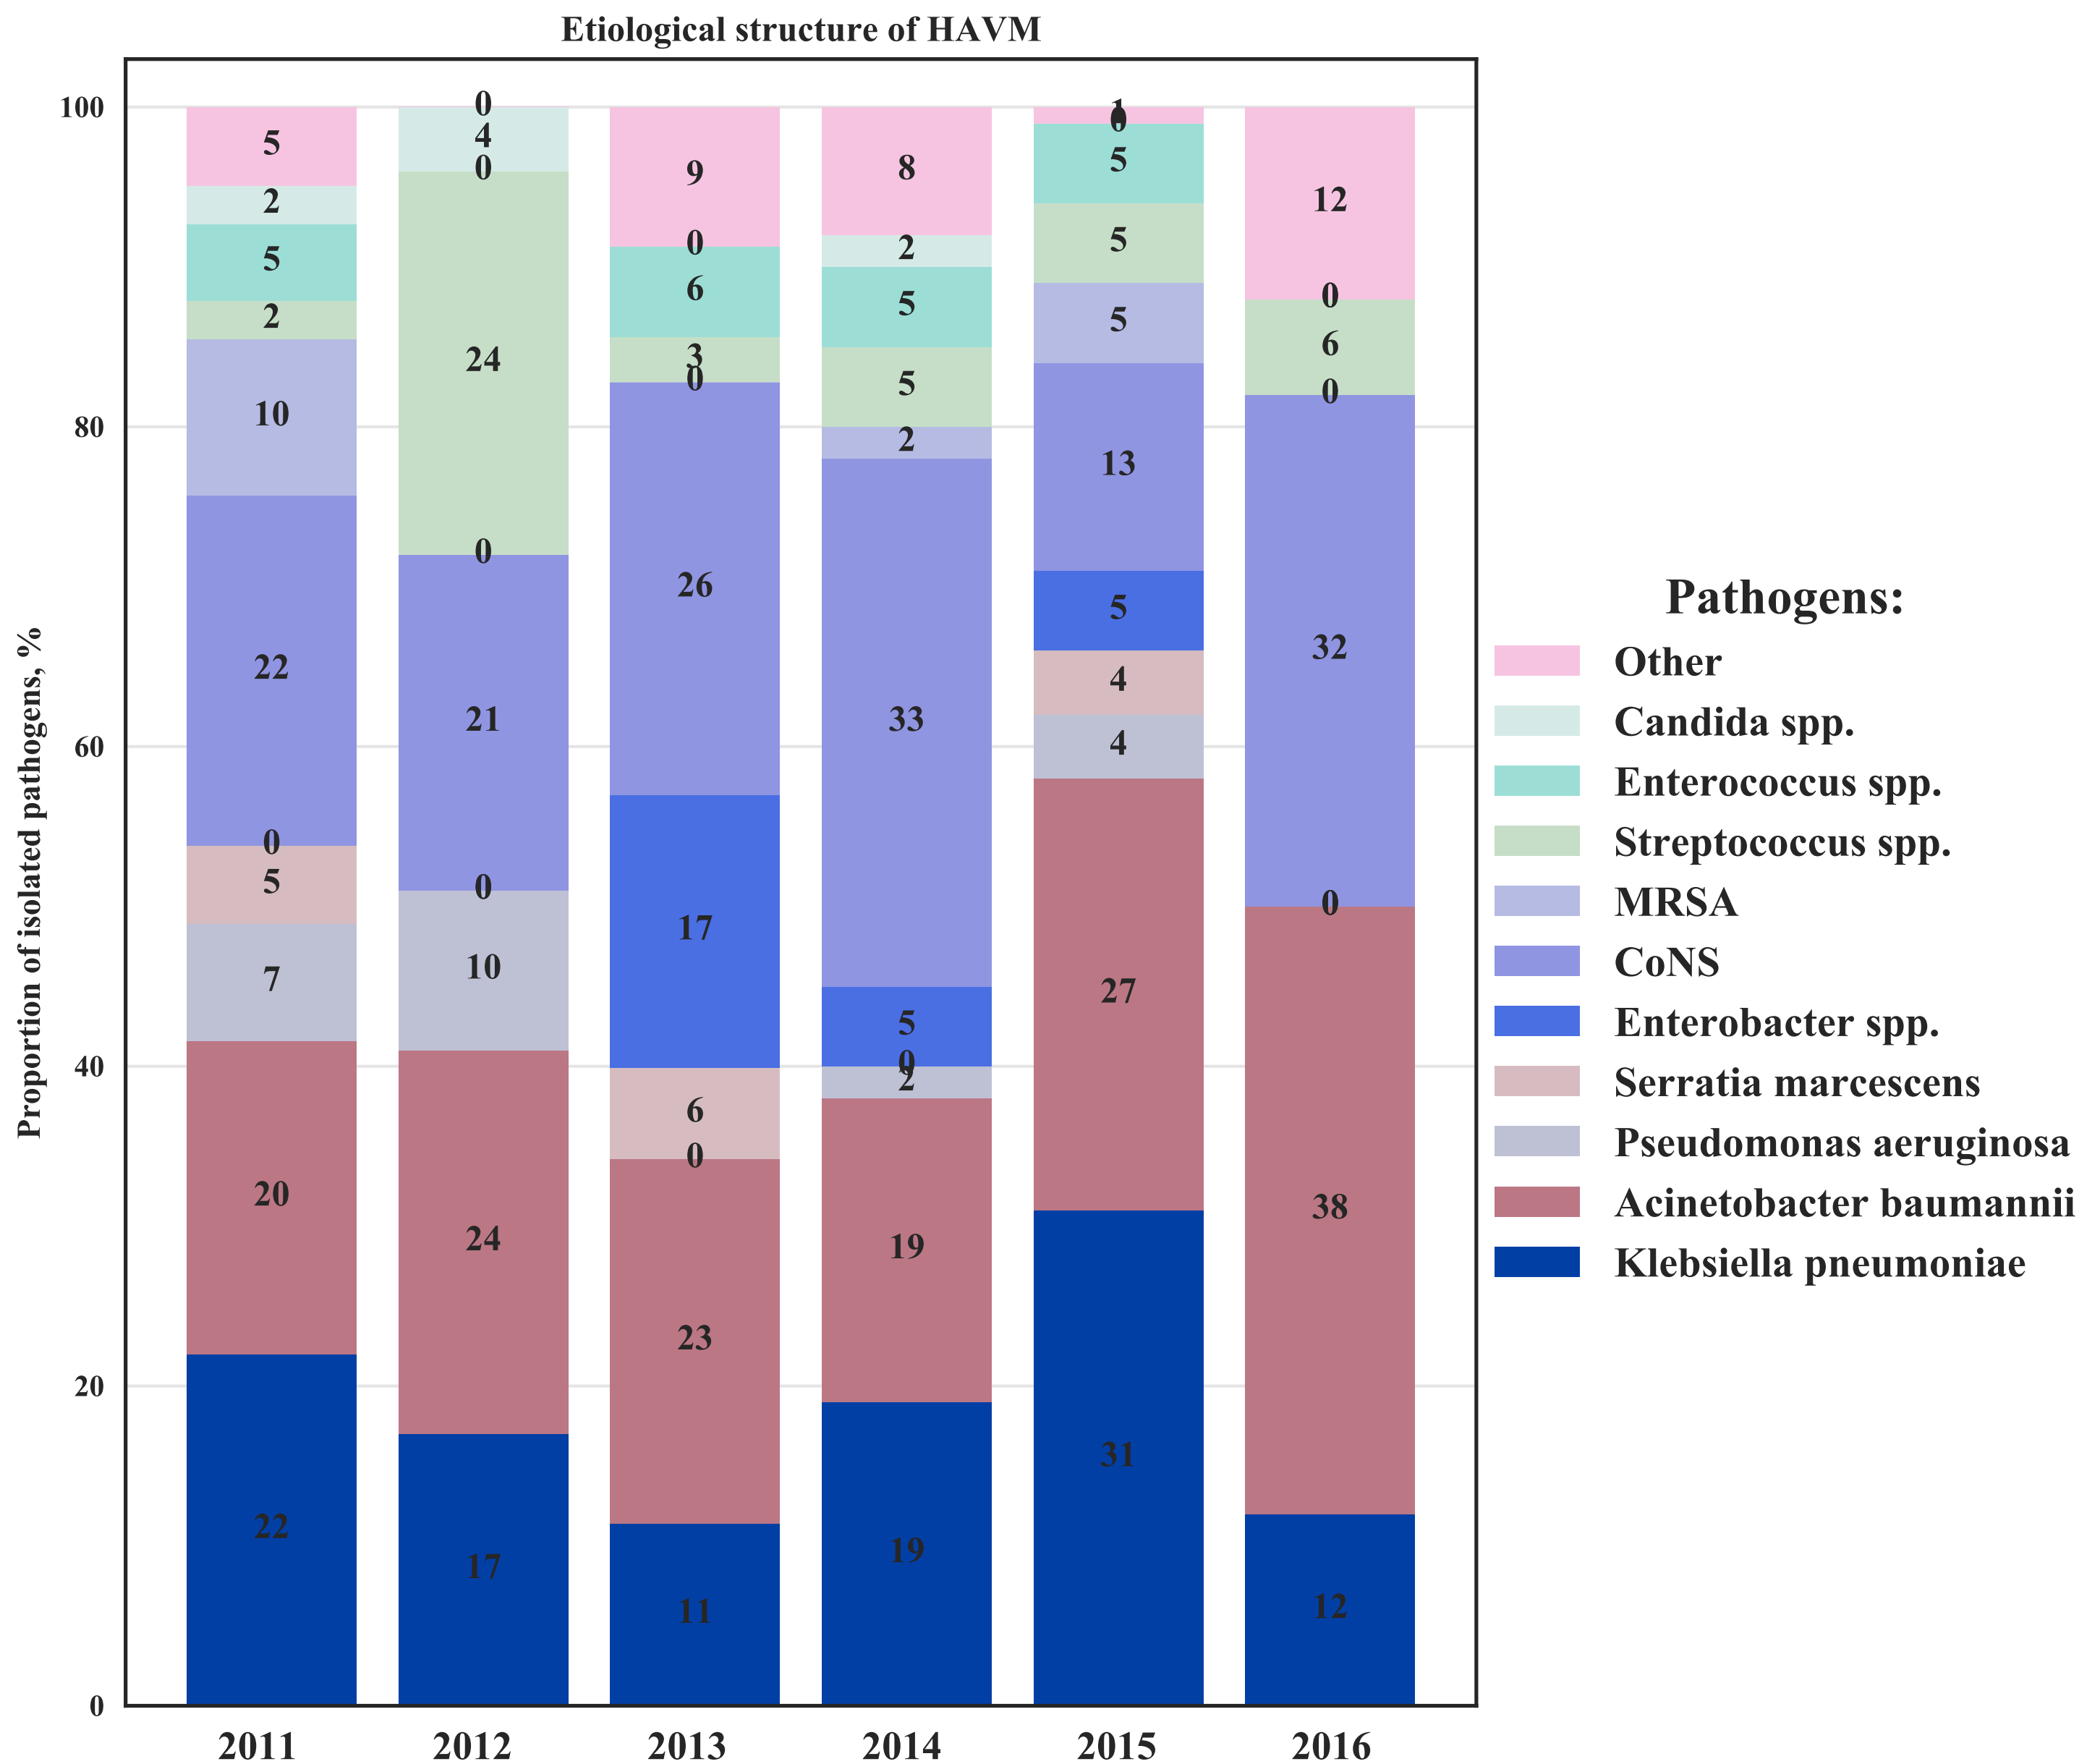

**Figure 2 Supplementary.** The dynamics of etiological structure of healthcare-associated ventriculitis and meningitis (HAVM) at the high-risk patient population in neuro-ICU from 2011 to 2016. Abbreviations: MRSA - methicillin-resistant *Staphylococcus aureus*; CoNS - coagulase-negative Staphylococci.



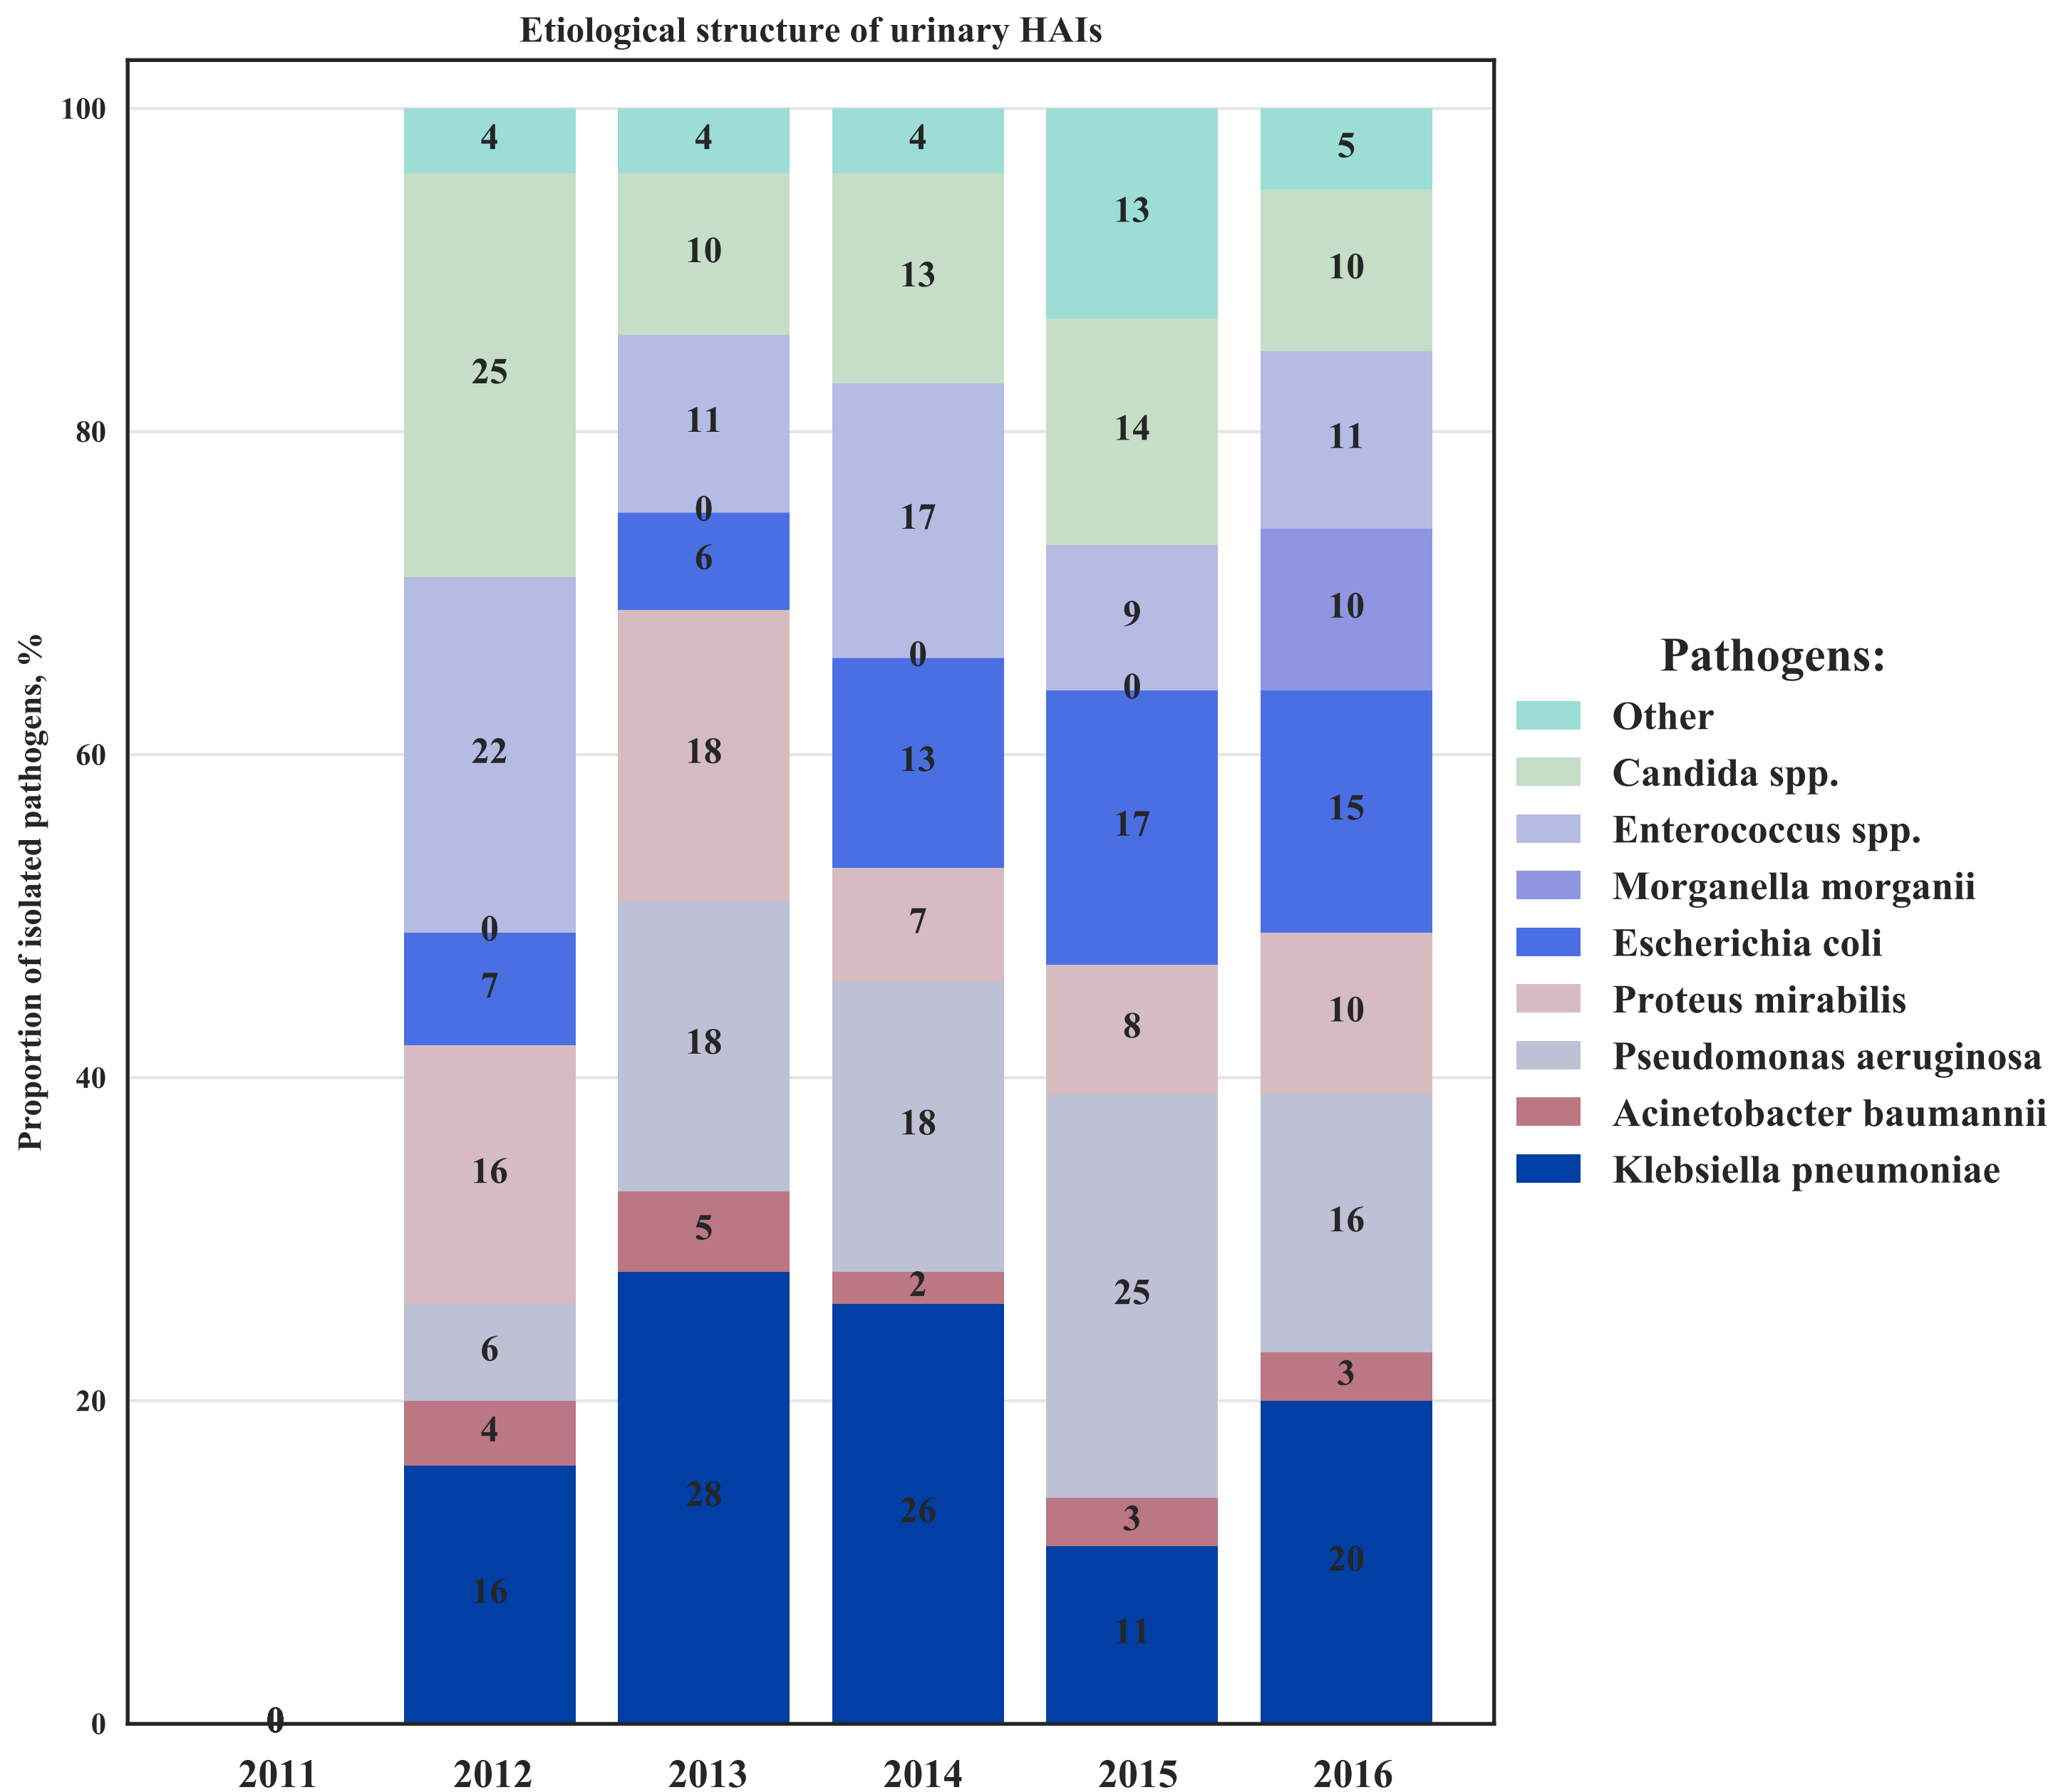

**Figure 3 Supplementary.** The dynamics of etiological structure of urinary tract HAIs at the high-risk patient population in neuro-ICU from 2011 to 2016. The monitoring of etiological structure of urinary tract HAIs was started in 2012.

## Supplementary Materials

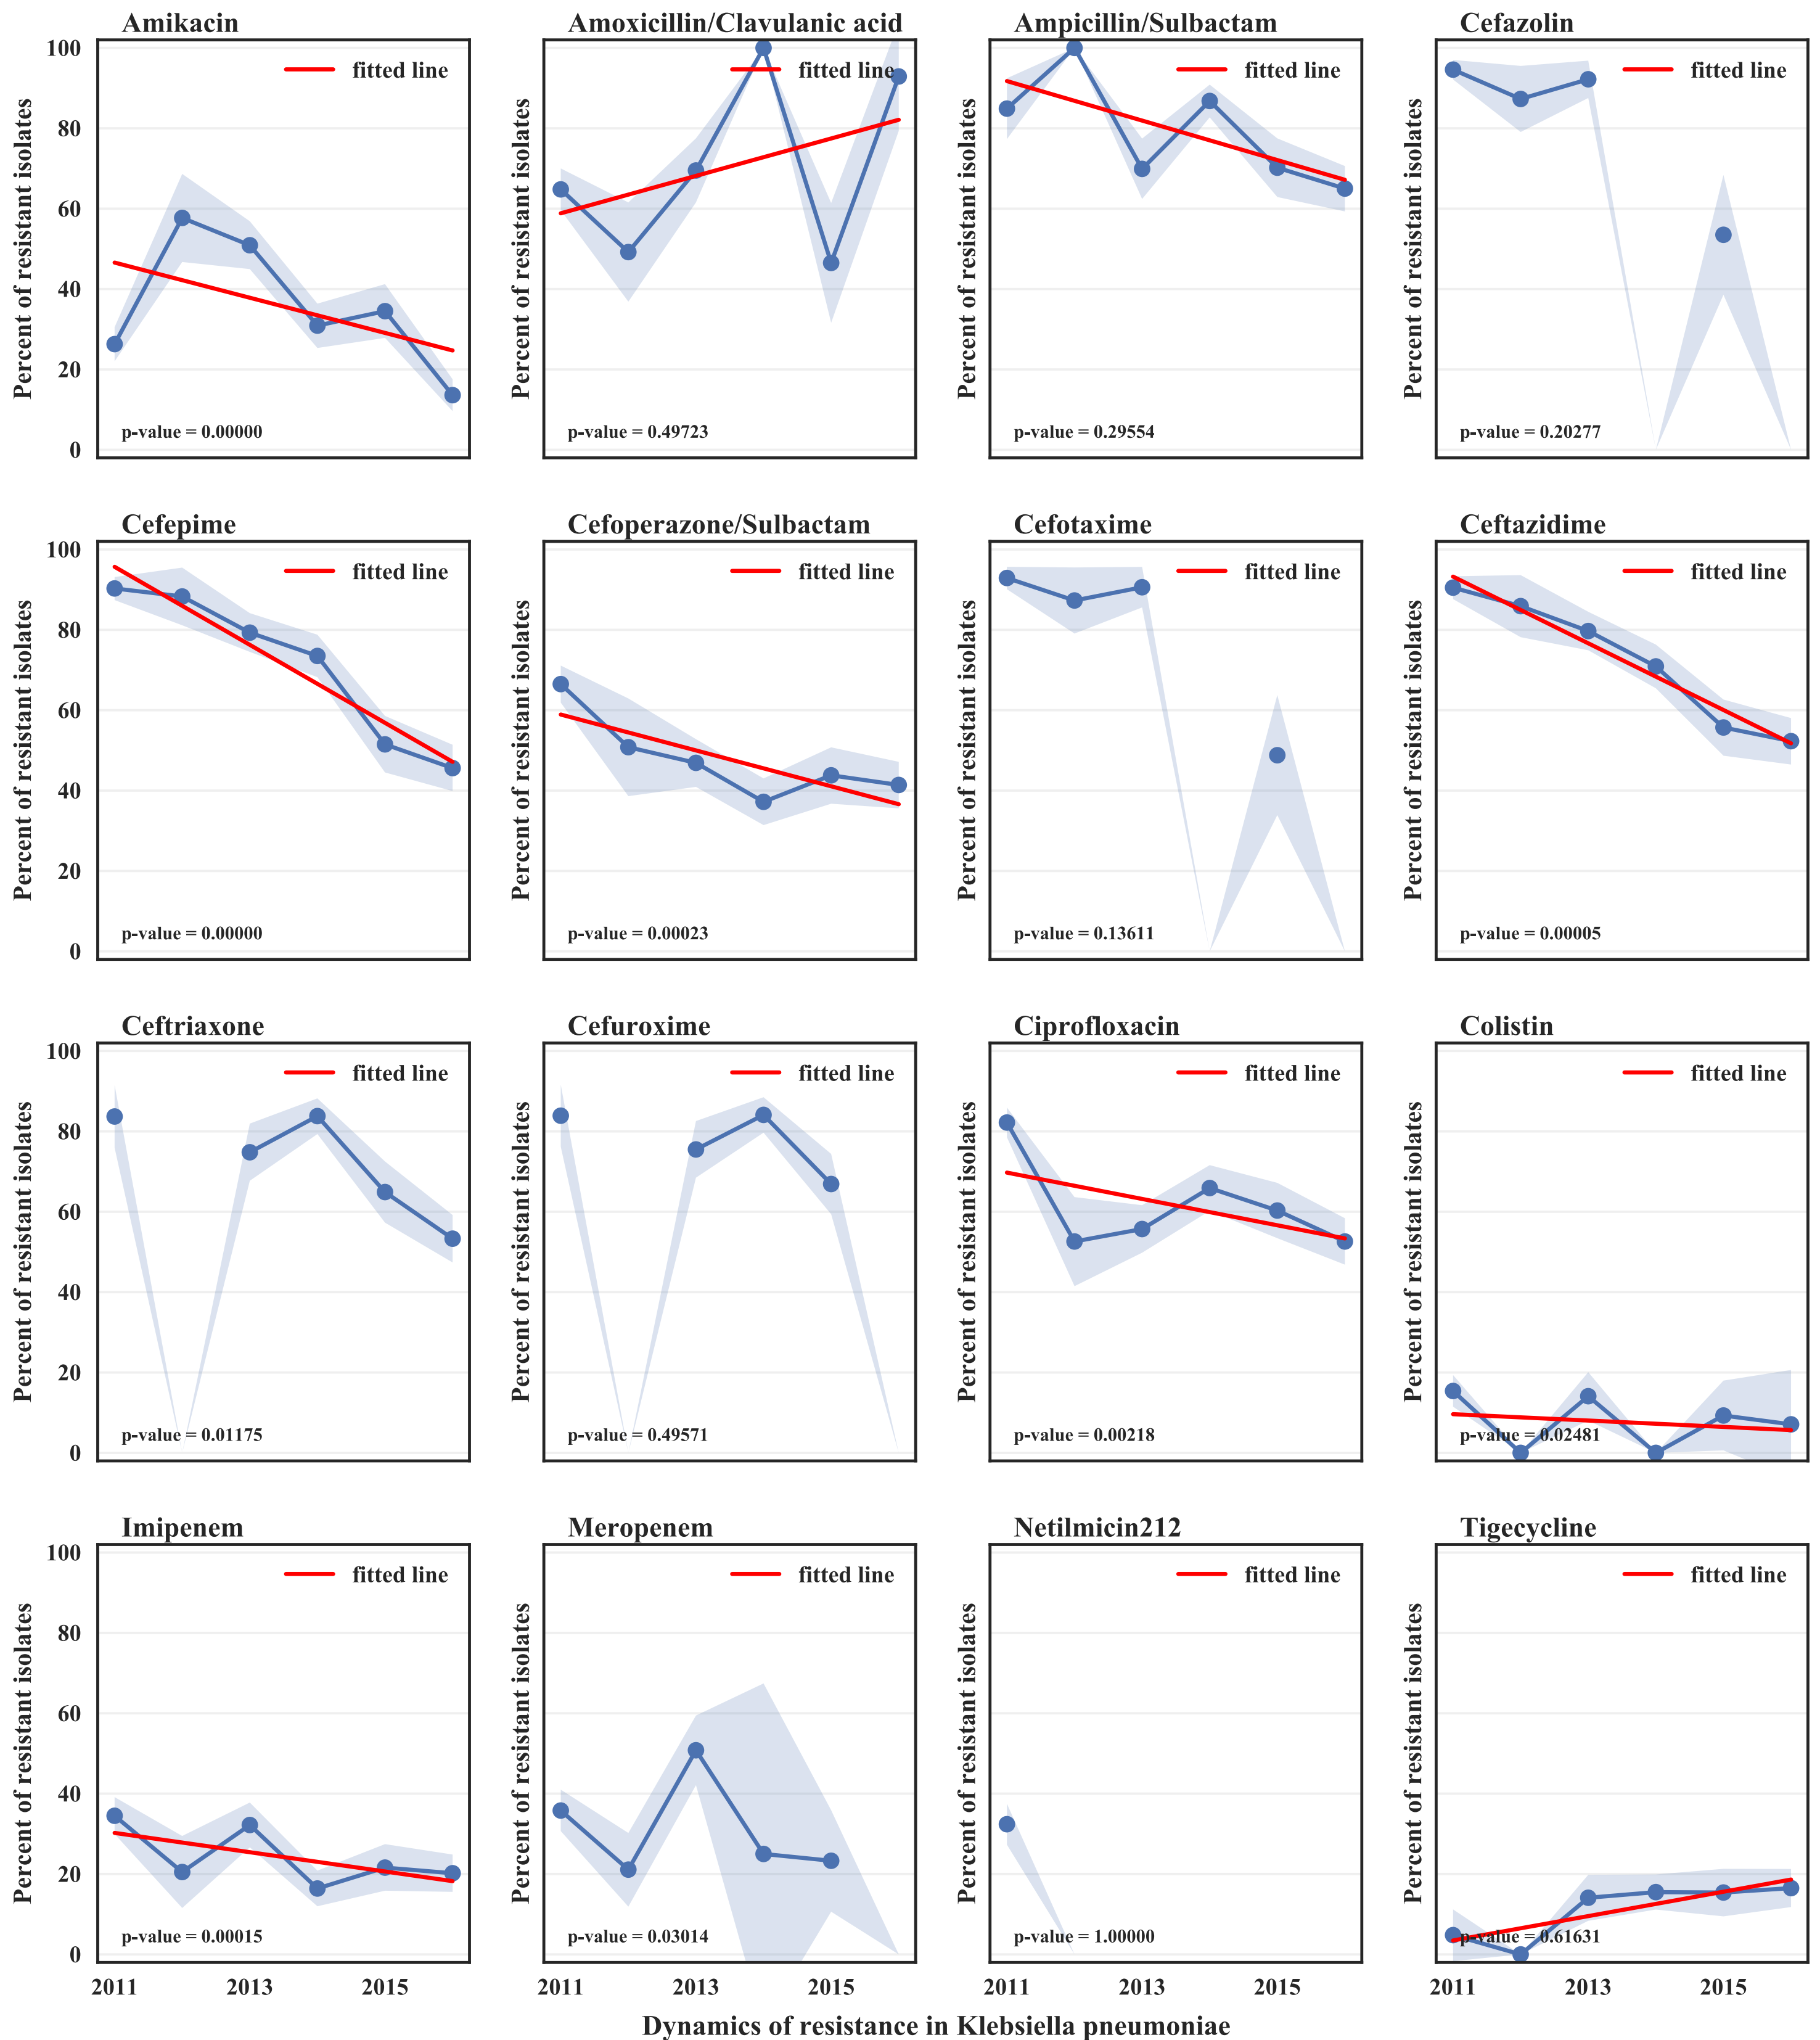

**Figure 4 Supplementary.** The dynamics of *Klebsiella pneumoniae* resistance to different antibiotics. Bacterial isolates were obtained from patients who had HAIs and were included in the study. Shaded area represents 95% confidence interval for binomial distribution, p-values calculated by Chi-square test.

## Supplementary Materials

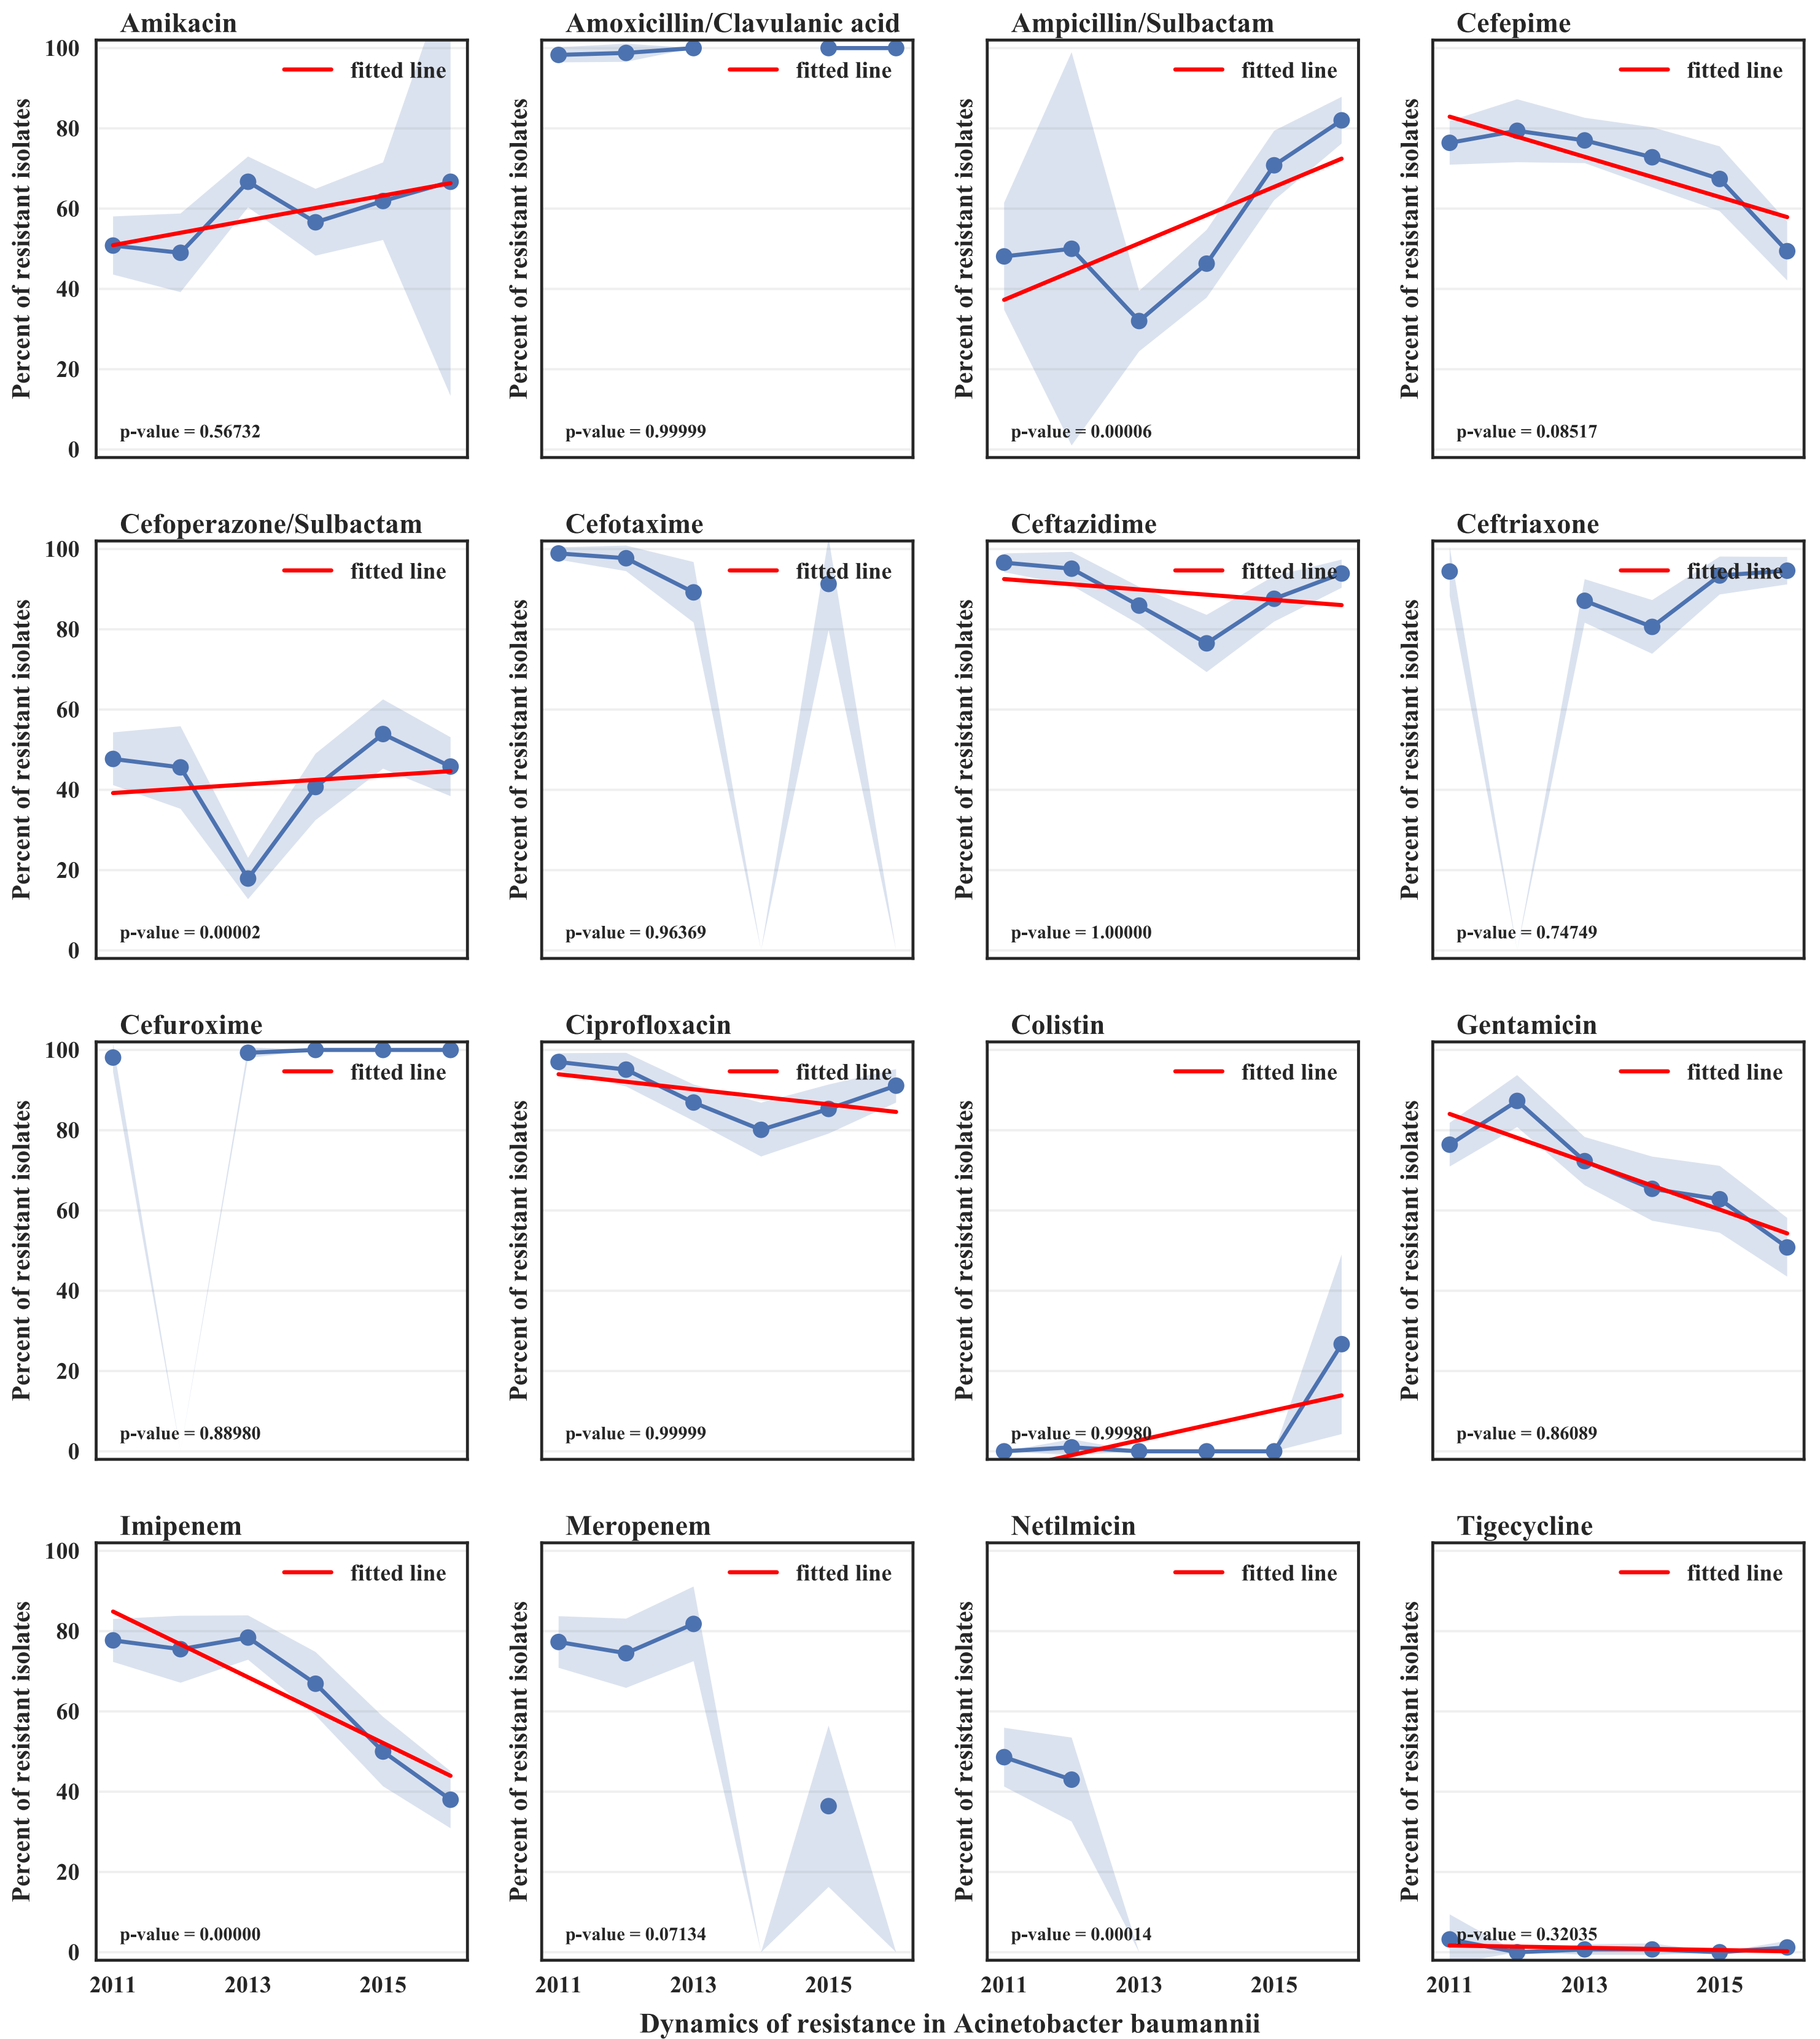

**Figure 5 Supplementary.** The dynamics of *Acinetobacter baumannii* resistance to different antibiotics. Bacterial isolates were obtained from patients who had HAIs and were included in the study. Shaded area represents 95% confidence interval for binomial distribution, p-values calculated by Chi-square test.

## Supplementary Materials

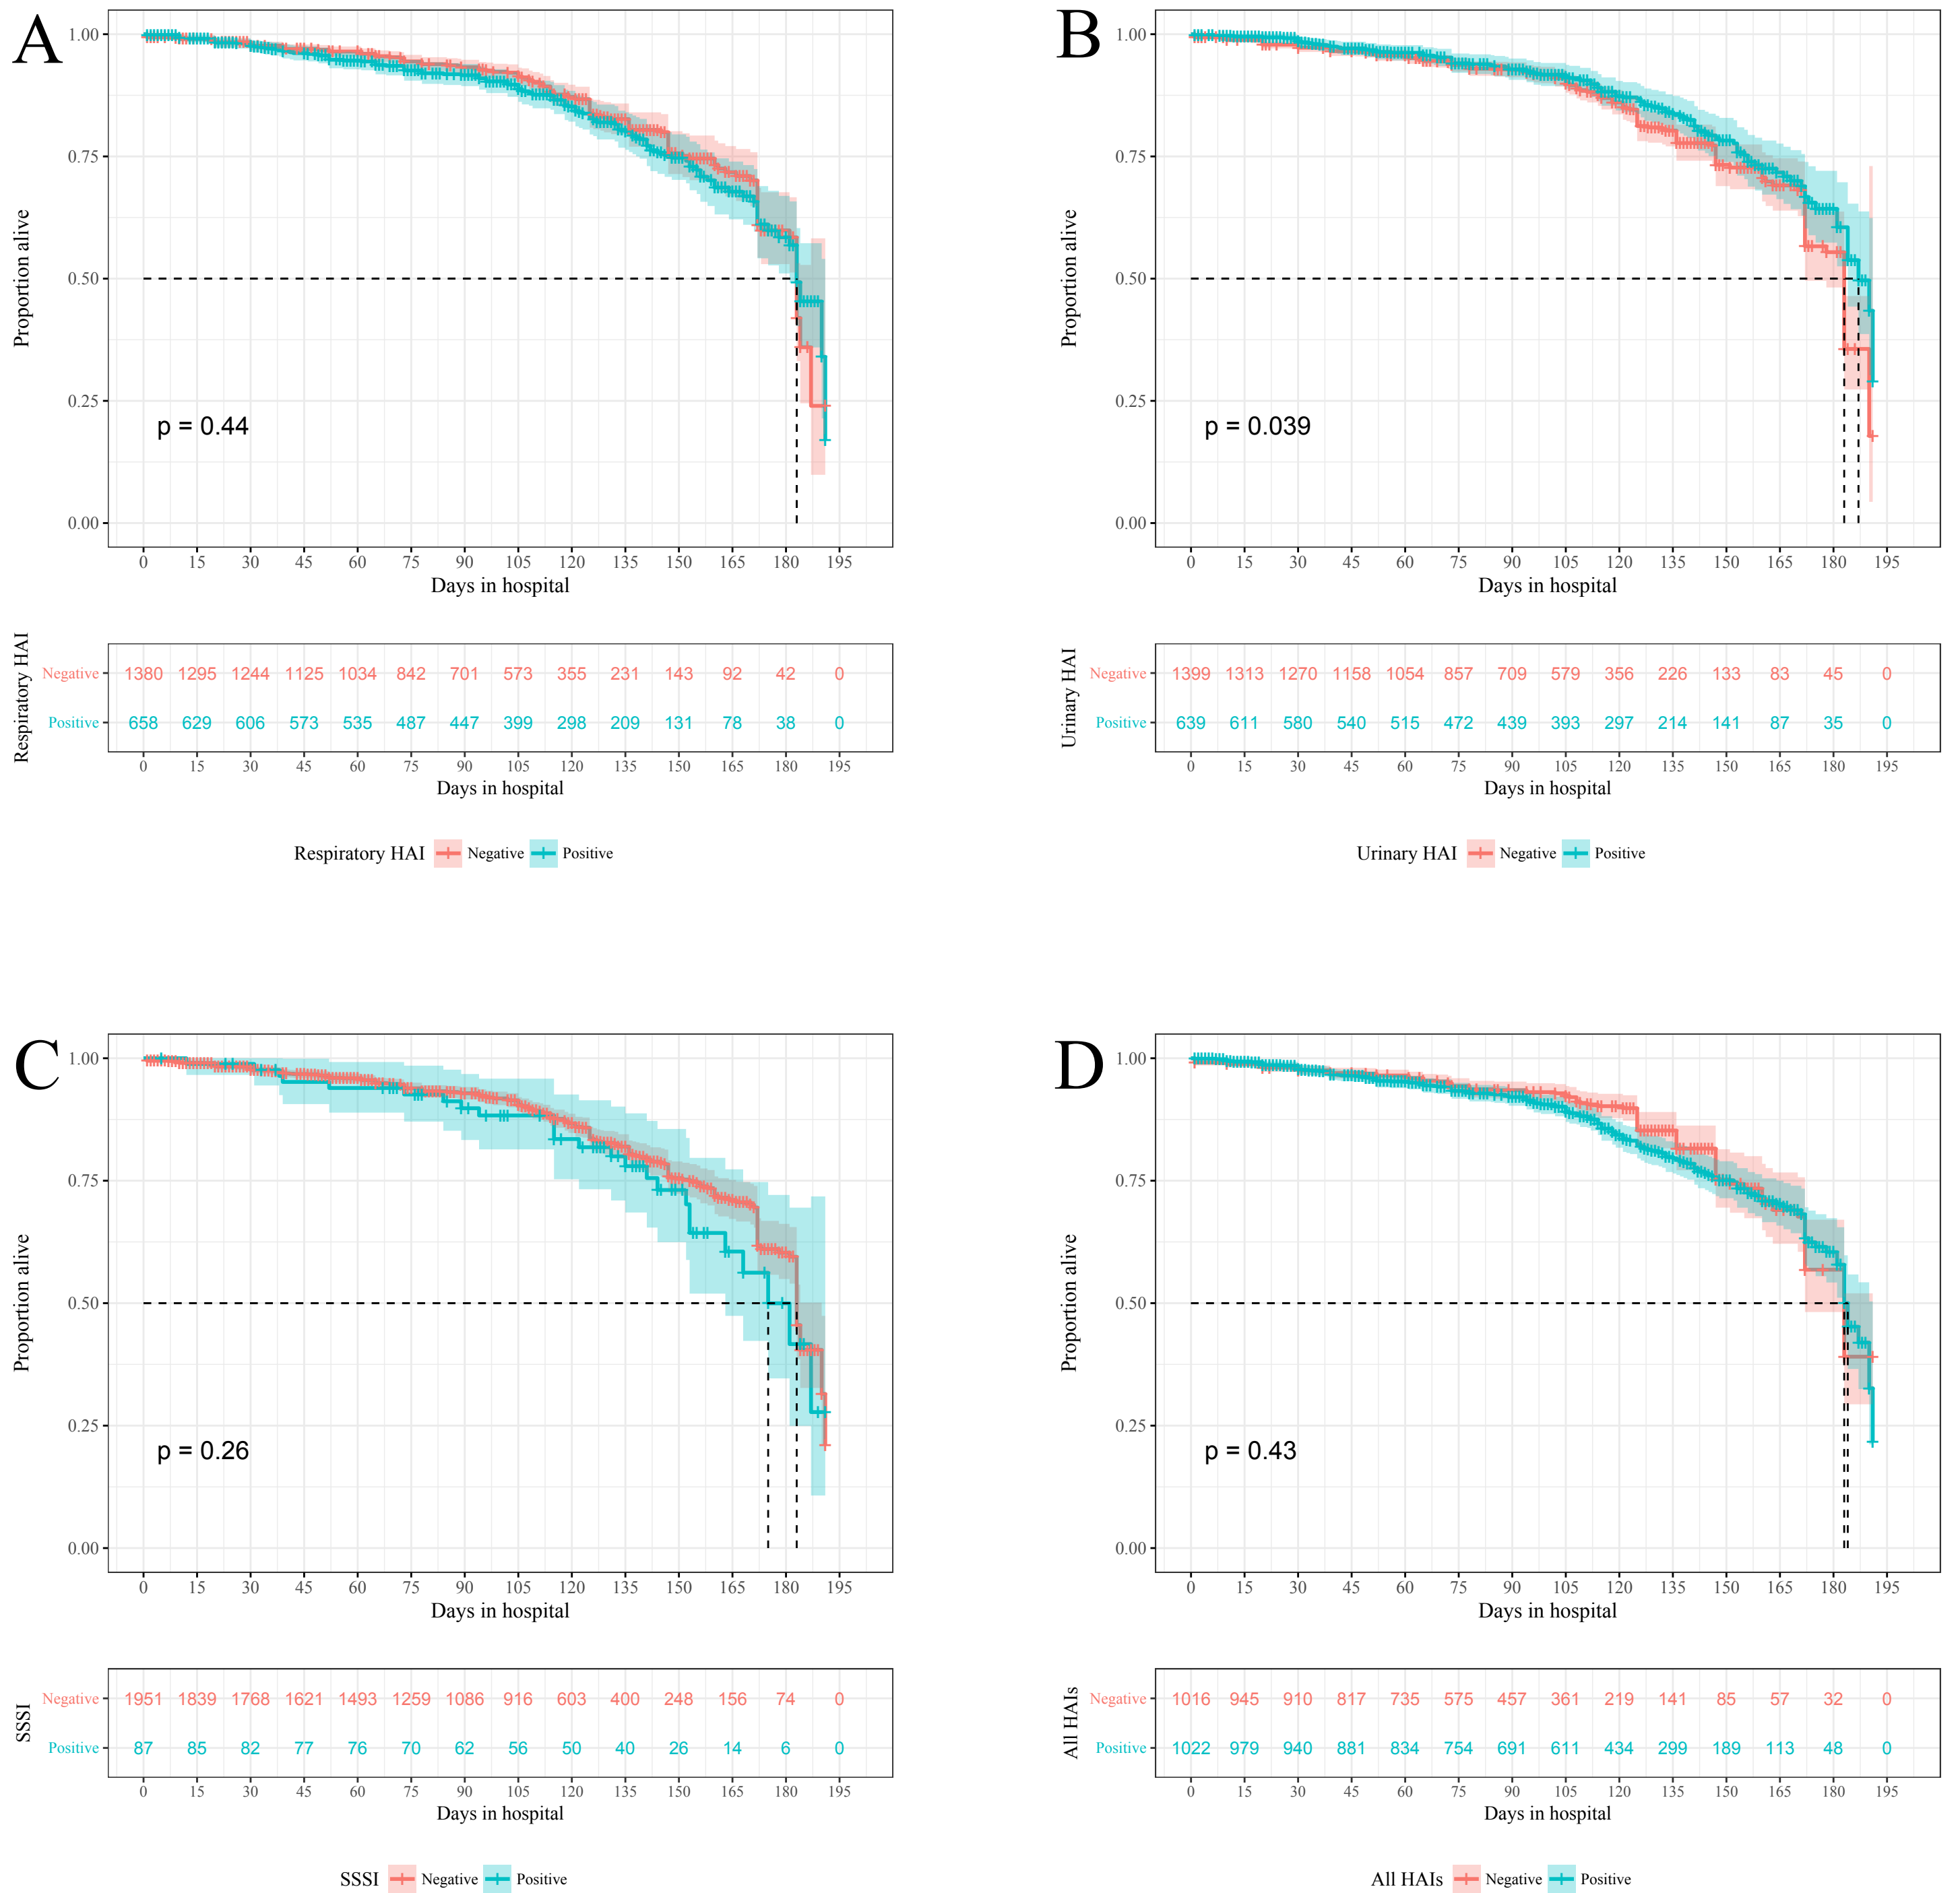

**Figure 6 Supplementary.** Survival curves for patients with and without different HAIs over six-year study period. Shaded area with corresponding color represents 95% confidence interval. Number of patients at risk in each group is presented in table below the graph. **A** - respiratory HAIs; **B** - urinary tract HAIs; **C** - superficial surgical site infection after neurosurgery; **D** - patients with at least one HAI.

## Supplementary Materials

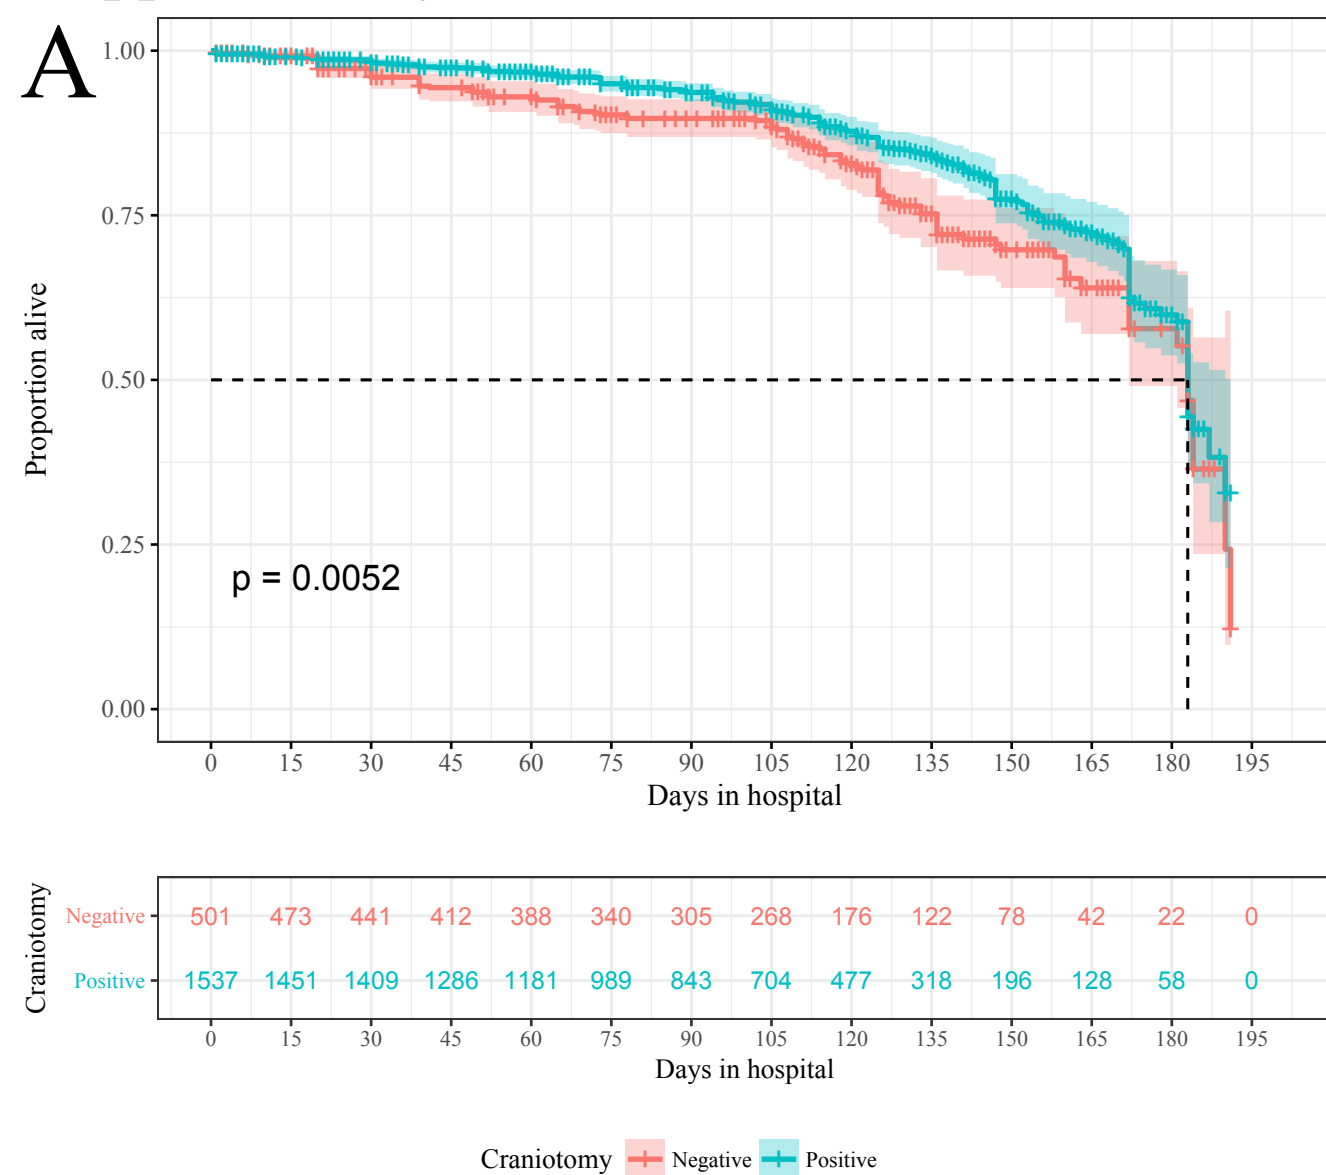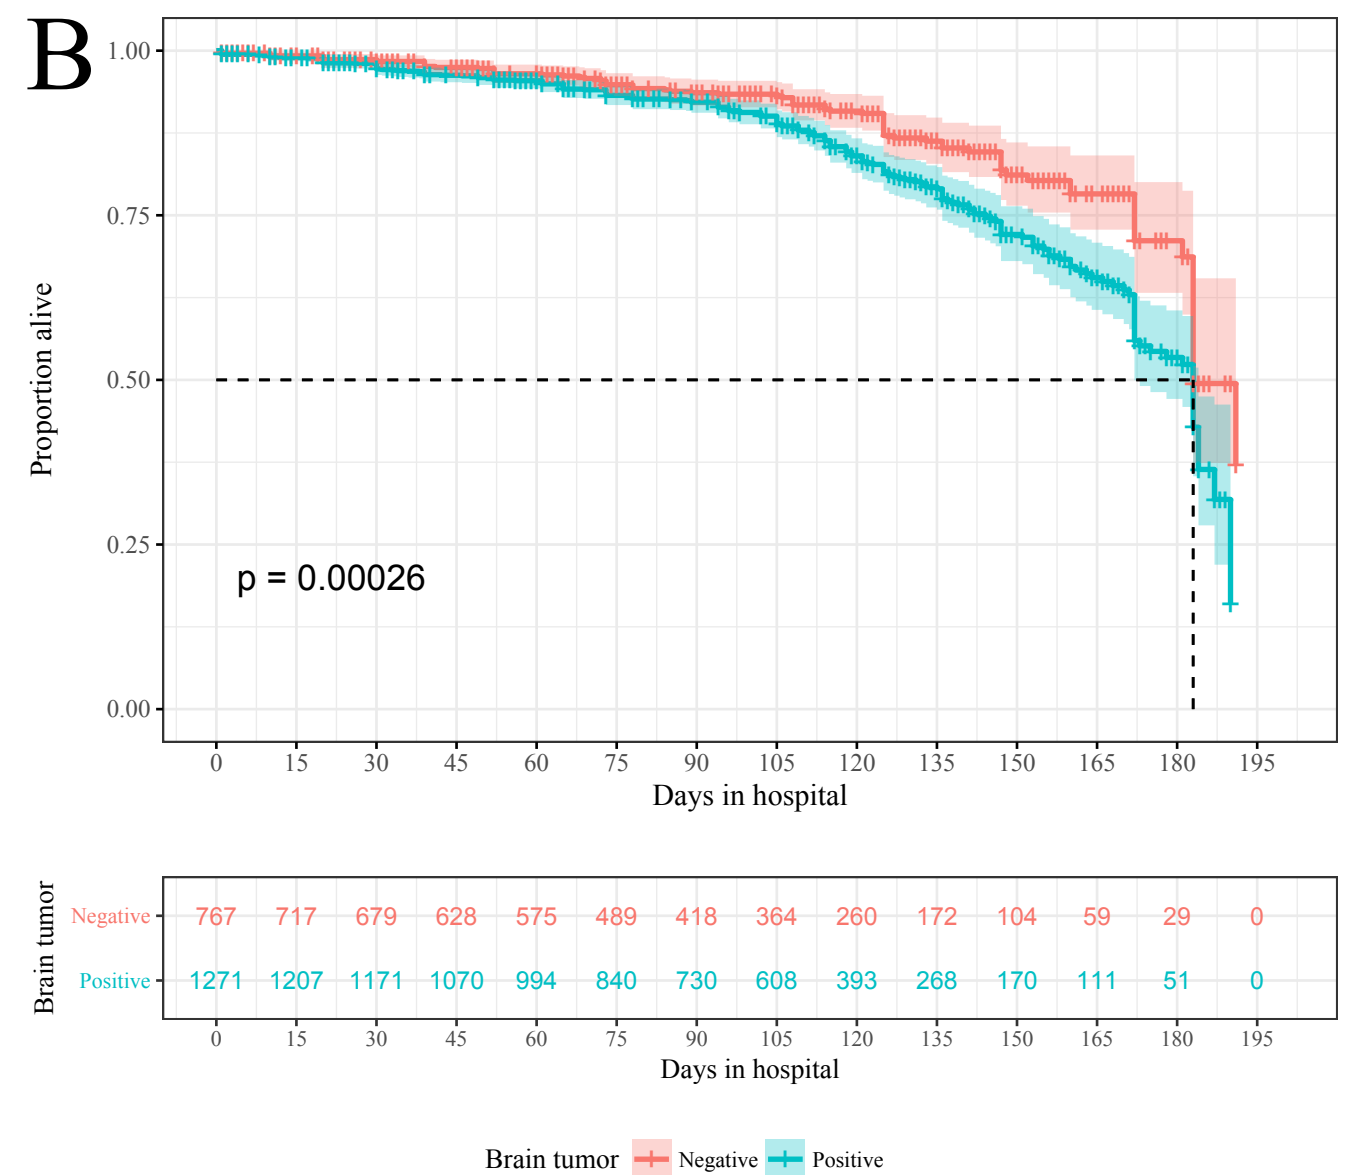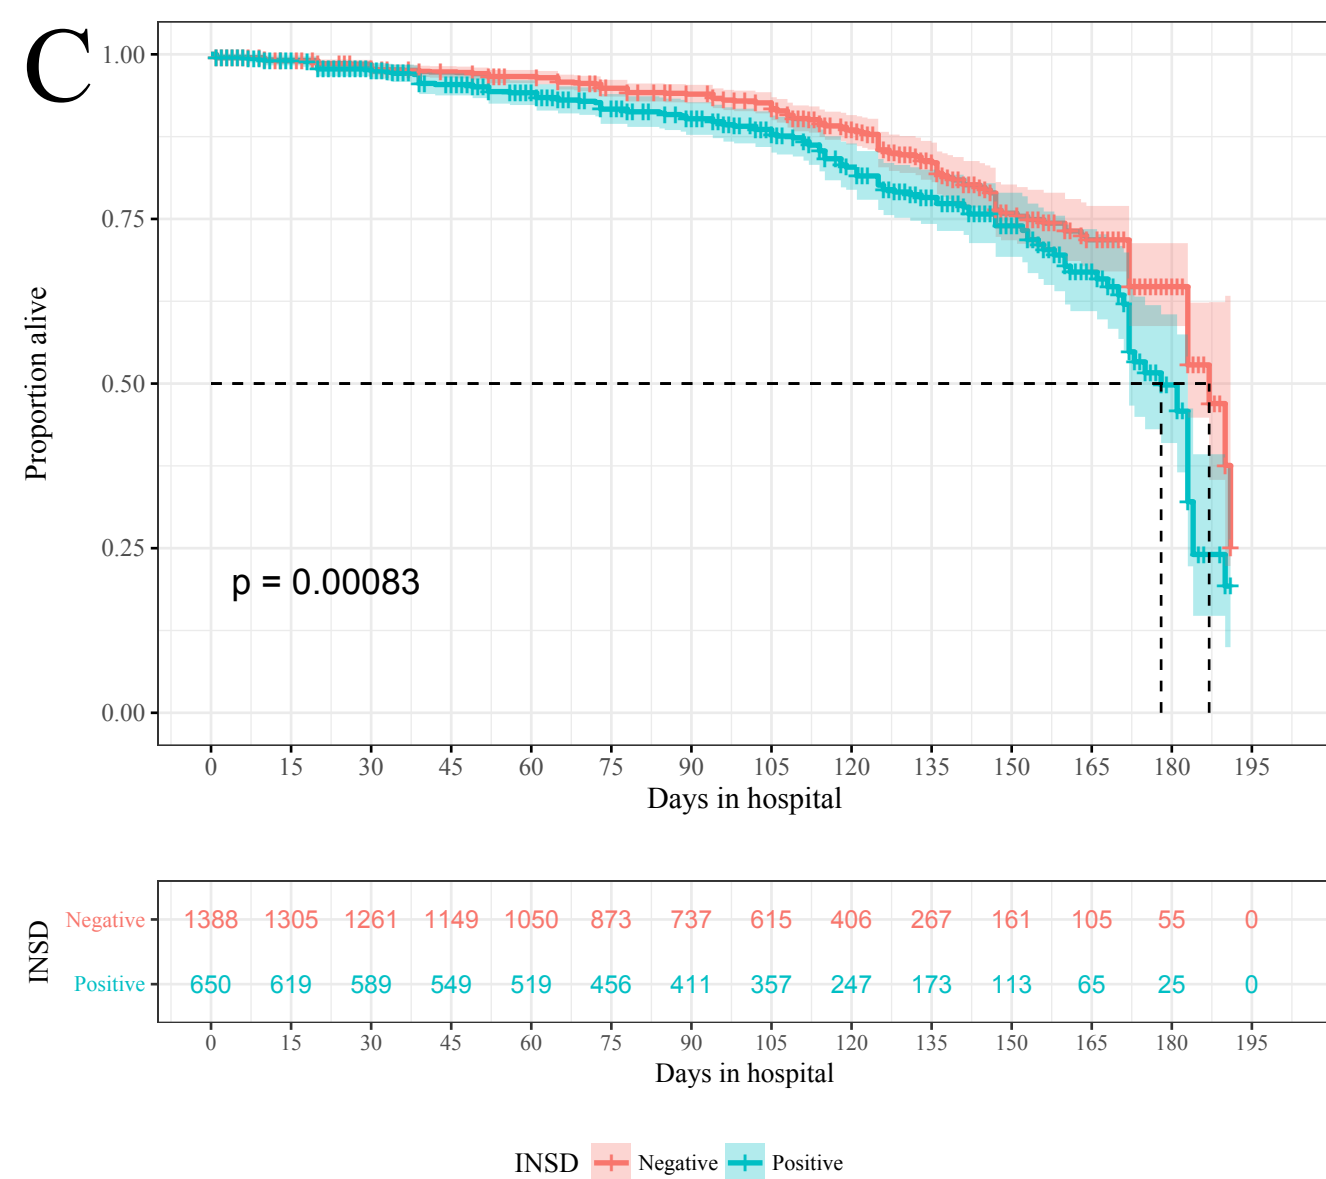

**Figure 7 Supplementary.** Survival curves for patients with and without different risk factor over six-year study period. Shadowed area with corresponding color represents 95% confidence interval. Number of patients at risk in each group is presented in table below the graph. **A** — craniotomy during hospital stay; **B** — diagnosis of brain tumor on admission; **C** — implantation of neurosurgical devices during hospital stay.

# Supplementary Materials

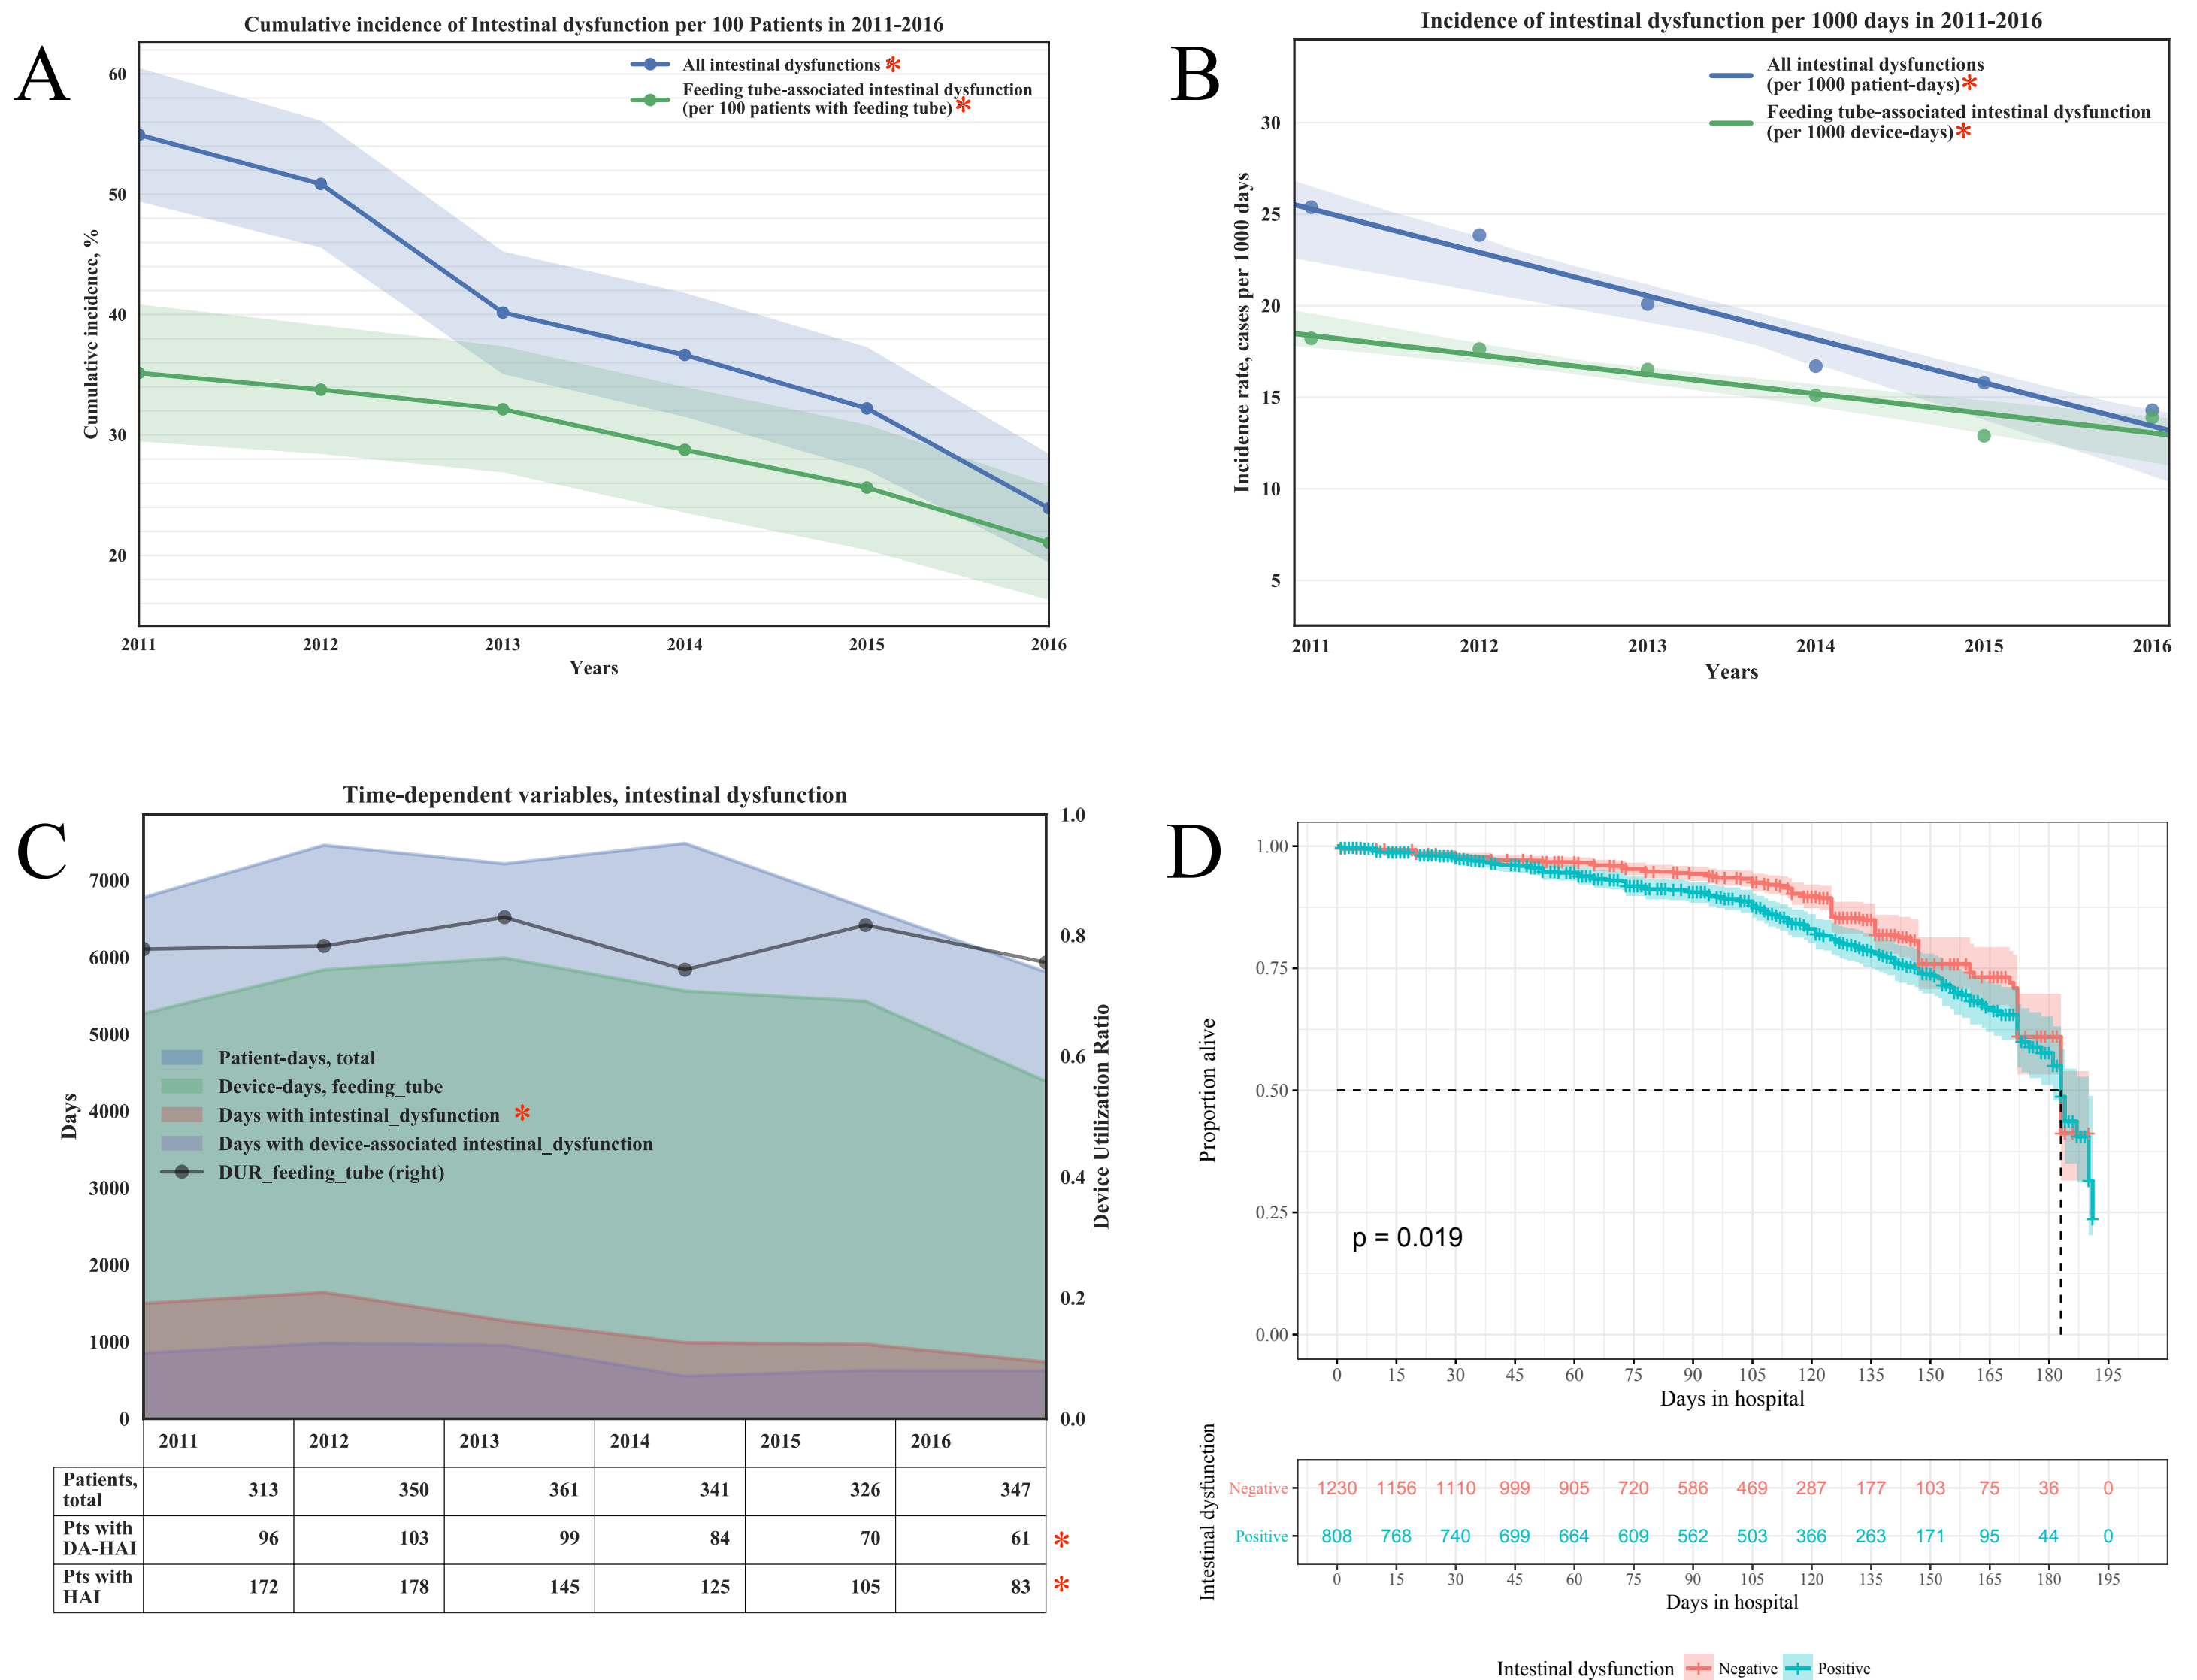

**Figure 8 Supplementary.** ICU-acquired intestinal dysfunction in high-risk ICU population in 2011-2016. **A** - cumulative incidence (%; shadowed area represents 95% confidence interval) of intestinal dysfunction. **B** - incidence rate of intestinal dysfunction per 1000 days (shadowed area represents the confidence interval for the regression estimate); **C** - time-dependent variables and device utilization ratio for feeding tube. **D** - survival curves in patients with and without intestinal dysfunction. Star (\*) marks p-value < 0.05 in group comparison.
